# Supplementary material for: Hydroxyl Radical Production by Air Pollutants in Epithelial Lining Fluid Governed by Interconversion and Scavenging of Reactive Oxygen Species
Source: PubMed Central journal article supplement (PMC8529872; doi:10.1021/acs.est.1c03875), 2021-10-05
Supplement: es1c03875_si_001.pdf [file es1c03875_si_001.pdf]

1 **Supplementary information to**

2 **Hydroxyl radical production by air pollutants in epithelial lining fluid governed by**  
3 **interconversion and scavenging of reactive oxygen species**

4  
5 Steven Lelieveld<sup>1</sup>, Jake Wilson<sup>1</sup>, Eleni Dovrou<sup>1</sup>, Ashmi Mishra<sup>1</sup>, Pascale S. J. Lakey<sup>2</sup>, Manabu Shiraiwa<sup>2</sup>,  
6 Ulrich Pöschl<sup>1</sup>, Thomas Berkemeier<sup>1\*</sup>

7  
8 [1] Multiphase Chemistry Department, Max Planck Institute for Chemistry, 55128 Mainz, Germany

9 [2] Department of Chemistry, University of California, Irvine, Irvine, California 92697, USA

10  
11 \*Correspondence to: Thomas Berkemeier ([t.berkemeier@mpic.de](mailto:t.berkemeier@mpic.de))

12  
13  
14  
15  
16  
17  
18  
19  
20  
21  
22  
23  
24  
25  
26  
27  
28  
29  
30  
31  
32  
33  
34  
35  
36  
37  
38  
39  
40  
41  
42  
43

## Contents of Supporting Information

### **Additional information**

- S1.** ELF antioxidant concentrations
- S2.** ELF enzymatic reactions
- S3.** OH reactions with unspecified organic matter and estimated OH lifetime in the ELF
- S4.** Particulate pollutant concentrations in the ELF
- S5.** Gas-phase pollutant concentrations in the ELF
- S6.** Acid dissociation
- S7.** pH of the ELF

### **Tables**

- Table S1.** Chemical reactions
- Table S2.** Input parameters to the KM-SUB-ELF model
- Table S3.** List of symbols and definitions
- Table S4.** Mathematical formulas used to calculate ROS metrics
- Table S5.** PM<sub>2.5</sub> and transition metal mass fractions
- Table S6.** PM<sub>2.5</sub> and Secondary Organic Aerosol (SOA) mass fractions
- Table S7.** PM<sub>2.5</sub> and quinone mass fractions

### **Figures**

- Figure S1.** Mass fractions of all redox-active PM<sub>2.5</sub> constituents quantified in field data.
- Figure S2.** Endpoint, and average ROS concentration,  $C_{\Sigma\text{ROS}}$ , in the ELF as a function of PM<sub>2.5</sub> concentration.
- Figure S3.** ROS concentration,  $C_{\Sigma\text{ROS}}$ , and antioxidant consumption rate as a function of pollutant concentration.
- Figure S4.** Gross chemical production of individual ROS in the ELF as a function of the concentration of three distinct pollutants.
- Figure S5.** O<sub>3</sub> and NO<sub>2</sub> concentration and saturation point in the ELF as a function of ambient pollutant concentration.
- Figure S6.** pH 4 sensitivity study.

## 44 **S1. ELF antioxidant concentrations**

45 Four low molecular weight antioxidants are included in this study, ascorbate (AsCH), glutathione (GSH),  
46 uric acid (UA) and  $\alpha$ -tocopherol ( $\alpha$ -Toc).<sup>1</sup> The concentrations of AsCH, GSH, and UA in the ELF are 40  $\mu$ M,  
47 108  $\mu$ M, and 200  $\mu$ M, respectively.<sup>2,3</sup> The total  $\alpha$ -Toc concentration in the ELF is reported as 0.7  $\mu$ M,<sup>3</sup>  
48 however, in the presented study  $\alpha$ -Toc is assumed to reside in the surfactant layer of the ELF with a  
49 concentration of 200  $\mu$ M. It is found that pollutant exposure can lead to a spike in  $C_{ZROS}$  at pollutant  
50 concentrations above 100  $\mu$ g m<sup>-3</sup> in the model (Fig. S3a) due to NO<sub>2</sub>-driven depletion of ELF antioxidants  
51 within the two hours simulation time (Fig. S3b). The reaction mechanism of ROS formation by NO<sub>2</sub> involves  
52 formation of GS $\cdot$  (R84-85, Tab. S1) and reaction to GSSG $\cdot$  (R89), leading to O<sub>2</sub> $\cdot^-$  production (R91).<sup>4,5</sup> In the  
53 presence of physiological concentrations of UA and AsCH, GS $\cdot$  is efficiently recycled to GSH (R96, R100)  
54 and GSSG $\cdot$  formation a minor reaction pathway. However, at low levels of UA and AsCH, this O<sub>2</sub> $\cdot^-$  formation  
55 pathway becomes increasingly important.

56  
57 Although earlier studies have shown that antioxidants can be consumed in bronchoalveolar lavage fluid  
58 after pollutant exposure,<sup>6</sup> a study using healthy volunteers suggested that the ELF antioxidants may not be  
59 fully depleted,<sup>7</sup> even after exposure to high pollutant concentrations. Kelly et al. found antioxidant  
60 concentrations to be non-zero 1.5 hours after exposure to 2 ppm NO<sub>2</sub> stopped, and in some cases  
61 exceeded the initial antioxidant concentration several hours after exposure due to antioxidant  
62 replenishment.<sup>7</sup> We are not aware of kinetic data that details the replenishment rates of antioxidants in ELF,  
63 but we can assume that they are likely fast enough to prevent full depletion of antioxidants in our two-hour  
64 simulations, preventing a spike in  $C_{ZROS}$  (Fig. S3a). Thus, for simplicity, antioxidant and surfactant  
65 concentrations are assumed to stay constant in this study.

66  
67 In Fig. S3b, antioxidant consumption rates are shown as a function of NO<sub>2</sub>, PM2.5 and O<sub>3</sub> concentration.  
68 The dashed line represents the antioxidant consumption rate above which the initial concentration of low  
69 molecular mass antioxidants depletes within two hours of pollutant exposure. Note that, without  
70 consideration of enzymatic reactions and antioxidant replenishment, it represents a lower limit for healthy  
71 individuals.

## 72 73 **S2. ELF enzymatic reactions**

74 Reactions of the enzymes superoxide dismutase (SOD) and catalase are included in the chemical  
75 mechanism (R124, R125, Tab. S1). In our previous work, the SOD-catalyzed reaction of two O<sub>2</sub> $\cdot^-$  forming  
76 H<sub>2</sub>O<sub>2</sub> and O<sub>2</sub> was described as a second-order reaction with respect to O<sub>2</sub> $\cdot^-$  and a rate coefficient of 2.70  $\times$   
77 10<sup>-12</sup> cm<sup>-3</sup> s<sup>-1</sup>.<sup>1,8</sup> Dismutation of O<sub>2</sub> $\cdot^-$  by SOD is a multi-step process, in which one O<sub>2</sub> $\cdot^-$  is oxidized to O<sub>2</sub>,  
78 another reduced to H<sub>2</sub>O<sub>2</sub>, and operates close to the diffusion limit.<sup>9</sup> Because SOD activity is often reported  
79 in terms of a single rate and turnover number, we combine both steps into one effective reaction of SOD

80 and  $O_2^-$  yielding 0.5  $H_2O_2$  and 0.5  $O_2$  (R124, Tab. S1). Note that this reaction is first order with respect to  
81 both,  $O_2^-$  and enzyme.

82 Cantin et al. (1990) showed experimentally that catalase is the most important molecule in  $H_2O_2$  defense  
83 of the ELF, exceeding the glutathione peroxidase concentration by nearly two orders of magnitude.<sup>10</sup> The  
84 reaction between catalase and  $H_2O_2$  is a two-step reaction in which a molecule of  $H_2O_2$  reacts with catalase  
85 to form an enzyme-substrate complex, which then further reacts with another molecule of  $H_2O_2$  to release  
86  $H_2O$  and  $O_2$ . Because catalase activity is often reported in terms of a single rate and turnover number, we  
87 combine both steps into one effective reaction of catalase and  $H_2O_2$ , yielding 0.5  $H_2O$  and 0.5  $O_2$  (R125,  
88 Tab. S1).<sup>11</sup>

89 The catalytic activity of a particular enzyme in biological samples is often reported using the enzyme unit  
90 (U) per sample volume or mass. One U is defined as the amount of enzyme needed to catalyze one  
91 micromole of substrate per minute. The catalytic activity of a biological sample is generally determined by  
92 monitoring substrate decomposition in excess of substrate. Under these conditions, catalytic activity is  
93 maximal and a first order dependence exists between the velocity of the enzymatic reaction ( $v_{max}$ , in  $U\ mL^{-1}$   
94  $s^{-1}$ ) and the enzyme concentration (Eq. S1).<sup>12</sup> The proportionality factor is the turnover number  $k_{cat}$ ,  
95 sometimes referred to as catalytic constant, and can be used to infer enzyme concentrations.<sup>13</sup>

$$[\text{Enzyme}] = \frac{v_{max}}{k_{cat}} \quad (\text{Eq. S1})$$

96

97 For SOD,  $k_{cat}$  is reported to range between  $10^5 - 10^6\ s^{-1}$ .<sup>9,14</sup> The activity of SOD in ELF was measured as  
98  $36.8 \pm 2.0\ U\ mL^{-1}$ ,<sup>10</sup> which translates to an enzyme concentration of SOD of 0.58 – 6.5 nM using Eq. S1.  
99 Note that, the enzymatic reactions in this study do not occur in excess of substrate. Thus, a second-order  
100 rate coefficient for the reaction of SOD with  $O_2^-$  of  $2.65 \times 10^{-12}\ cm^{-3}\ s^{-1}$  is used in the chemical mechanism  
101 ( $k_{R124}$ , Tab. S1).<sup>15,16</sup>

102 Catalase activity in ELF has been estimated to be  $3.7 \pm 0.6\ U\ mL^{-1}$  and for  $k_{cat}$ , values in the range of  $3 \times$   
103  $10^6$  and  $4 \times 10^7\ s^{-1}$  can be found.<sup>10,13</sup> From these numbers, we derive a concentration of catalase of 1.3 –  
104 24 pM. Second-order rate coefficients for catalase have been measured in the range of  $1.6 \times 10^{-14} - 1.6 \times$   
105  $10^{-13}\ cm^{-3}\ s^{-1}$ . For this study, we use a rate coefficient of  $3.2 \times 10^{-14}\ cm^{-3}\ s^{-1}$  ( $k_{R125}$ , Tab. S1).<sup>11,17</sup>

106 Given the broad reported ranges of  $v_{max}$  and  $k_{cat}$ , and the difficulty of sampling ELF, we acknowledge that  
107 there is large uncertainty associated with the concentrations of SOD and catalase in the ELF. Therefore,  
108 we restrict the determination of enzyme concentration to order of magnitude estimations and use 1 nM for  
109 SOD and 5 pM for catalase in this study.

110 Note that the presence of PM may decrease the activity of antioxidant enzymes, as shown for SOD  
111 previously.<sup>18</sup> At the high PM concentrations for which these effects were observed, however, antioxidant

112 enzymes contribute only marginally to overall ROS scavenging and interconversion in the model (Figs.  
113 4b,d). Thus, enzyme inhibition by PM<sub>2.5</sub> requires further investigation in future experimental and modelling  
114 studies to clarify whether enzyme inhibition promotes the shift to the PM<sub>2.5</sub>-dominated kinetic regime of  
115 ROS conversion.

116

### 117 **S3. Unspecific reaction of OH radicals with organic matter and estimated OH lifetime in the**

#### 118 **ELF**

119 OH reacts with nearly all matter present in the ELF with a rate coefficient approaching diffusion limitation.<sup>19</sup>  
120 Because of this unspecific reactivity, effective scavenging of OH radicals, e.g. through lung antioxidants, is  
121 not possible.<sup>19,20</sup> As an estimate, we assume that the amount of protein in the ELF corresponds to the total  
122 amount of dissolved organic matter. The protein mass in the ELF amounts to approximately 10 mg per mL  
123 lung fluid.<sup>3</sup> Using an average molecular weight of ~125 g mole<sup>-1</sup> of a single amino acid, the total amino acid  
124 concentration in the ELF can be estimated to ~80 mmol L<sup>-1</sup>. A second-order reaction of amino acids with  
125 OH is included, using a reaction rate coefficient on the order of 1.66 x 10<sup>-12</sup> cm<sup>3</sup> s<sup>-1</sup> (R122, Tab. S1).<sup>21</sup>  
126 Because proteins are folded, not all amino acids will be surface exposed, and thus accessible reaction  
127 partners for OH. In general, spherical proteins have fewer surface exposed amino acids due to a smaller  
128 surface-to-volume ratio, while elongated, cuboid or conical proteins have more surface exposed amino  
129 acids. Furthermore, the surface exposure of amino acids depends on the physical properties, e.g. the  
130 polarity of the respective amino acid.<sup>22</sup> Therefore, as an order of magnitude estimation, we assume that  
131 50% of all amino acids are surface exposed in the ELF, yielding an effective amino acid concentration of  
132 ~40 mmol L<sup>-1</sup> and, in turn, a lifetime of OH with respect to reaction with dissolved organic matter of 2.5 x  
133 10<sup>-8</sup> s.

134

135 Pryor estimated the lifetime of OH in a cell to 10<sup>-9</sup> s, assuming a rate coefficient of 1 x 10<sup>9</sup> M<sup>-1</sup> s<sup>-1</sup> (equivalent  
136 to 1.66 x 10<sup>-12</sup> cm<sup>3</sup> s<sup>-1</sup>) and an effective organic matter concentration of 1 mol L<sup>-1</sup>.<sup>21</sup> From comparing the  
137 ELF protein mass of ~10 mg mL<sup>-1</sup> to the cellular protein mass of ~250 mg mL<sup>-1</sup>, we infer that the ELF must  
138 be about ~25 times more dilute compared to a cell with respect to dissolved organic matter.<sup>2,23,24</sup> Multiplying  
139 Pryor's OH lifetime in cells with this dilution factor yields an estimate for the OH lifetime in ELF of ~2.5 x  
140 10<sup>-8</sup> s, which is identical to the estimate above and consolidates our description of OH reactivity.

141

142 We find that inclusion of this second-order loss reaction of OH results in a decrease of momentary OH  
143 concentrations by one order of magnitude compared to our earlier calculations (Fig. 2a).<sup>1</sup> This finding  
144 suggests that OH will react unspecifically with organic matter and only secondarily with antioxidants (7%)  
145 in the ELF. Due to the fast reaction of OH, spatial gradients of reactants could play a role in OH fate, e.g.  
146 through local depletion of antioxidants around a dissolving particle or inhomogeneous distribution of organic  
147 matter and PM<sub>2.5</sub> constituents in the ELF. However, for the calculations in this study, starting  
148 concentrations of antioxidants and organic matter were homogeneous across the bulk ELF.

149

#### 150 **S4. Particulate pollutant concentrations in the ELF**

151 The ELF concentrations of redox-active PM<sub>2.5</sub> constituents,  $C_{ELF,Y}$ , with Y standing for copper, iron, SOA,  
152 or quinones, are calculated using Eq. S2.<sup>1</sup>

153

$$C_Y = \frac{C_{gas,PM2.5} \times VR \times t_{acc} \times d_{PM2.5} \times MF_Y \times SF_Y}{M_Y \times V_{ELF}} \quad (\text{Eq. S2})$$

154

155 Inhaled particles can reside in the ELF for several hours.<sup>25</sup> For this study, we assume a residence time of  
156 PM<sub>2.5</sub> of 2 hours and use this as accumulation time of inhaled particles ( $t_{acc}$ ) and simulation time ( $t_{sim}$ ) to  
157 mimic a pseudo steady-state of ROS concentrations that would be achieved through continuous inhalation,  
158 in line with our previous studies.<sup>1</sup> It should be noted that there is some uncertainty regarding the residence  
159 time of PM<sub>2.5</sub> in the ELF, with estimates on PM<sub>2.5</sub> clearance also exceeding 2 hours.<sup>26</sup> As lung ventilation  
160 rate,  $VR$ , 1.5 m<sup>3</sup> h<sup>-1</sup> is used, and the PM<sub>2.5</sub> deposition fraction in the ELF,  $d_{PM2.5}$ , is assumed to be 0.45.<sup>1,27</sup>  
161 The total ELF volume,  $V_{ELF}$ , is set to 20 mL.<sup>1,28</sup> This study only includes copper and iron as transition metals,  
162 because these are the only two that have been shown to significantly produce ROS in surrogate ELF  
163 (sELF).<sup>29,30</sup> The fractional solubilities,  $SF_Y$ , of copper and iron ions were discussed and tested extensively  
164 in our previous study, including the effects of varying trace metal solubilities.<sup>1</sup> In line with the main results  
165 of our previous study, the fractional solubilities of copper and iron ions are set to 0.4, 0.1, respectively.<sup>1</sup>  
166 Due to the relatively small concentration of iron ions and the large concentration of potential organic ligands,  
167 iron ions are expected not to precipitate in the ELF.<sup>31</sup> For the organic fraction in PM<sub>2.5</sub>, full solubility is  
168 assumed. Mass fractions ( $MF$ ) of redox-active PM<sub>2.5</sub> constituents are derived from field observations and  
169 tabulated in Tables S4-S6. Not all references in Tables S4 and S6 include PM<sub>2.5</sub> concentrations. In such  
170 cases, PM<sub>2.5</sub> concentrations are estimated based on similar geographical locations and indicated with an  
171 asterisk. Additionally, secondary organic aerosol (SOA) forms ROS and is included in the model.<sup>32-34</sup>  
172 However, because the exact mechanism of ROS formation by SOA in the ELF, first order formation rates  
173 of H<sub>2</sub>O<sub>2</sub> and OH by SOA were parameterized based on experimental observations.<sup>1,32,33</sup> Quinones in PM<sub>2.5</sub>  
174 are included in this study as previously described.<sup>1</sup> Three quinones are included that were shown to form  
175 ROS in sELF, phenanthrenequinone (PQN), 1,2-naphthoquinone (1,2-NQN), and 1,4-naphthoquinone (1,4-  
176 NQN) in a molar ratio of 2:1:1.<sup>29</sup>

177

#### 178 **S5. Gas-phase pollutant concentrations in the ELF**

179 Exposure to gas-phase oxidants, O<sub>3</sub> and NO<sub>2</sub> is quantified in the model using a simplified breathing  
180 mechanism. In our previous study, it was assumed that the concentrations of these gas-phase oxidants in  
181 the lung were equal to their respective ambient concentrations. However, because of the reactivity of these  
182 oxidants, we find that lung gas-phase concentrations of these oxidants are depressed and limited by supply  
183 from inhalation of ambient air. In order to get accurate estimates for the amount of gas-phase oxidants

184 transferred to the surfactant layer and ELF, an average lung volume of four L, an average breath volume  
185 of 1.5 L and an average duration of a breath of 3.6 s are used to compute mass fluxes into and out of the  
186 lung (Table S2). Application of this simplified breathing mechanism results in a significant decrease in the  
187 amount of gaseous oxidants in the surfactant layer and ELF. Therefore, neither  $O_3$ , nor  $NO_2$  are saturated  
188 in ELF with respect to their ambient concentrations in this study (Fig. S5).

189

## 190 **S6. Acid dissociation**

191 In this study, corresponding acid/base-pairs are treated as a single species in the numerical computation  
192 of ordinary differential equations (ODE). This effectively reduces the stiffness of the ODE system and  
193 applies to glutathione ( $GSH/GS^-$ ), superoxide radicals ( $HO_2/O_2^-$ ) and peroxyxynitrous acid ( $ONOOH/ONOO^-$ ).  
194 Instead of treating each species explicitly with separate differential equations and explicit protonation and  
195 deprotonation reactions, the pKa of these species was used to calculate the acid/base-ratio at the pH of  
196 the ELF (Table S2). Then, if a reaction requires only one of the two species to react, the rate of that reaction  
197 was multiplied with the inferred fraction of the reacting species.

198

## 199 **S7. pH of the ELF**

200 Following estimations by Holma (1985, 1989), the pH of the ELF was assumed to stay constant upon air  
201 pollutant exposure.<sup>35,36</sup> In diseased individuals such as asthmatics<sup>37</sup>, chronic obstructive pulmonary  
202 disease,<sup>38</sup> or cystic fibrosis patients<sup>39</sup> the pH of the ELF may be decreased. Figure S6 shows the ROS  
203 concentration, production, interconversion and transition metal valence state at pH 7 and pH 4 as a function  
204 of PM2.5 concentration. Panel a shows that  $C_{\Sigma ROS}$  displays a very similar behavior at pH 4 and pH 7.  $C_{O_2}$   
205 and  $C_{HO_2}$  are slightly increased at low PM2.5 concentrations, but depressed at elevated PM2.5  
206 concentrations (panel b). This reduction is due to a higher rate of  $Fe^{2+}$ -mediated interconversion of  $HO_2$   
207 and  $O_2^-$  to  $H_2O_2$  (Table S1, R38 and R39), which in turn is due to a higher  $Fe^{2+}/Fe^{3+}$  ratio (panel c). The  
208  $Cu^+/Cu^{2+}$  ratio shows the opposite trend at reduced pH (panel j).

209 Panel e shows that at pH 4,  $N_{\Sigma ROS}$  is marginally reduced compared to pH 7. In panel f,  $N_{\Sigma ROS}$  is broken  
210 down to its components.  $P_{O_2^-}$  is slightly reduced due to decreased  $Cu^+$ -dependent  $O_2^-$  formation (Table S1,  
211 R54).  $P_{OH}$  is slightly increased due to the higher  $Fe^{2+}/Fe^{3+}$  ratio and the according increase in the Fenton  
212 reaction (Table S1, R40).

213 Panel g shows that  $CF_{O_2 \rightarrow H_2O_2}$  is slightly decreased at low PM2.5 concentration and slightly increased at  
214 higher PM2.5 concentrations compared to pH 7. Panel h shows that  $CF_{H_2O_2 \rightarrow OH}$  is mostly unaffected by a  
215 change in pH. The reduction in  $N_{\Sigma ROS}$  (panel e) paired with the increase in  $P_{OH}$  (panel f) at higher PM2.5  
216 concentrations results in a larger OH fraction (panel i) and a larger increase in OH dose (panel j) at pH 4.

217 Reduced pH in the ELF may additionally lead to a reduction in antioxidant enzyme activity,<sup>17</sup> increased  
218 transition metal solubility,<sup>40</sup> and increased OH yield from the Fenton reaction.<sup>41,42</sup> These effects are not  
219 included in the presented study, and are expected to all reduce ROS buffering and promote the PM2.5-

220 controlled OH radical production regime, which may exacerbate oxidative stress. Furthermore, in the  
221 presented study SOA produces H<sub>2</sub>O<sub>2</sub> and OH,<sup>32,33</sup> which at lower pH may increasingly shift towards only  
222 H<sub>2</sub>O<sub>2</sub> production, without OH getting formed.<sup>43,44</sup> However, a thorough investigation of pH effects is beyond  
223 the scope of the presented study and warrants future investigations.



224 **References**

- 225 (1) Lakey, P. S. J.; Berkemeier, T.; Tong, H.; Arangio, A. M.; Lucas, K.; Pöschl, U.; Shiraiwa, M.  
226 Chemical Exposure-Response Relationship between Air Pollutants and Reactive Oxygen Species  
227 in the Human Respiratory Tract. *Sci. Rep.* **2016**, *6* (1), 32916.  
228 <https://doi.org/10.1038/srep32916>.
- 229 (2) Mudway, I. S.; Kelly, F. J. Ozone and the Lung: A Sensitive Issue. *Mol. Aspects Med.* **2000**, *21* (1–  
230 2), 1–48. [https://doi.org/10.1016/S0098-2997\(00\)00003-0](https://doi.org/10.1016/S0098-2997(00)00003-0).
- 231 (3) van der Vliet, A.; O’Neill, C. A.; Cross, C. E.; Koostra, J. M.; Volz, W. G.; Halliwell, B.; Louie, S.  
232 Determination of Low-Molecular-Mass Antioxidant Concentrations in Human Respiratory Tract  
233 Lining Fluids. *Am. J. Physiol.-Lung Cell. Mol. Physiol.* **1999**, *276* (2), L289–L296.  
234 <https://doi.org/10.1152/ajplung.1999.276.2.L289>.
- 235 (4) Kirsch, M.; Lehnig, M.; Korth, H.-G.; Sustmann, R.; de Groot, H. Inhibition of Peroxynitrite-  
236 Induced Nitration of Tyrosine by Glutathione in the Presence of Carbon Dioxide through Both  
237 Radical Repair and Peroxynitrate Formation. *Chem. Eur. J.* **2001**, *7* (15), 3313–3320.  
238 [https://doi.org/10.1002/1521-3765\(20010803\)7:15<3313::aid-chem3313>3.0.co;2-7](https://doi.org/10.1002/1521-3765(20010803)7:15<3313::aid-chem3313>3.0.co;2-7).
- 239 (5) Wardman, P.; Sonntag, C. [3] Kinetic factors that control the fate of thiyl radicals in cells. In  
240 *Methods in Enzymology*; Elsevier: gr, 1995; Vol. 251, pp 31–45. [https://doi.org/10.1016/0076-  
241 6879\(95\)51108-3](https://doi.org/10.1016/0076-6879(95)51108-3).
- 242 (6) Kelly, F. J.; Tetley, T. D. Nitrogen Dioxide Depletes Uric Acid and Ascorbic Acid but Not  
243 Glutathione from Lung Lining Fluid. *Biochem. J.* **1997**, *325* (1), 95–99.  
244 <https://doi.org/10.1042/bj3250095>.
- 245 (7) Kelly, F. J.; Blomberg, A.; Frew, A.; Holgate, S. T.; Sandstrom, T. Antioxidant Kinetics in Lung  
246 Lavage Fluid Following Exposure of Humans to Nitrogen Dioxide. *Am. J. Respir. Crit. Care Med.*  
247 **1996**, *154* (6), 1700–1705. <https://doi.org/10.1164/ajrccm.154.6.8970358>.
- 248 (8) Kohen, R.; Nyska, A. Invited Review: Oxidation of Biological Systems: Oxidative Stress  
249 Phenomena, Antioxidants, Redox Reactions, and Methods for Their Quantification. *Toxicol.*  
250 *Pathol.* **2002**, *30* (6), 620–650. <https://doi.org/10.1080/01926230290166724>.
- 251 (9) Fee, J. A.; Bull, C. Steady-State Kinetic Studies of Superoxide Dismutases. Saturative Behavior of  
252 the Copper- and Zinc-Containing Protein. *J. Biol. Chem.* **1986**, *261* (28), 13000–13005.  
253 [https://doi.org/10.1016/S0021-9258\(18\)69261-0](https://doi.org/10.1016/S0021-9258(18)69261-0).
- 254 (10) Cantin, A. M.; Fells, G. A.; Hubbard, R. C.; Crystal, R. G. Antioxidant Macromolecules in the  
255 Epithelial Lining Fluid of the Normal Human Lower Respiratory Tract. *J. Clin. Invest.* **1990**, *86* (3),  
256 962–971. <https://doi.org/10.1172/JCI114798>.
- 257 (11) Aebi, H. [13] Catalase in Vitro. *Methods Enzymol.* **1984**, *105*, 121–126.
- 258 (12) Bisswanger, H. *Practical Enzymology*; John Wiley & Sons, 2019.
- 259 (13) Smejkal, G. B.; Kakumanu, S. Enzymes and Their Turnover Numbers. *Expert Rev. Proteomics*  
260 **2019**, *16* (7), 543–544. <https://doi.org/10.1080/14789450.2019.1630275>.
- 261 (14) Bar-Even, A.; Noor, E.; Savir, Y.; Liebermeister, W.; Davidi, D.; Tawfik, D. S.; Milo, R. The  
262 Moderately Efficient Enzyme: Evolutionary and Physicochemical Trends Shaping Enzyme  
263 Parameters. *Biochemistry* **2011**, *50* (21), 4402–4410. <https://doi.org/10.1021/bi2002289>.
- 264 (15) Forman, H. J.; Fridovich, I. Superoxide Dismutase: A Comparison of Rate Constants. *Arch.*  
265 *Biochem. Biophys.* **1973**, *158* (1), 396–400. [https://doi.org/10.1016/0003-9861\(73\)90636-X](https://doi.org/10.1016/0003-9861(73)90636-X).
- 266 (16) Fridovich, I. Superoxide Dismutases. *Annu. Rev. Biochem.* **1975**, *44* (1), 147–159.
- 267 (17) Jones, P.; Suggett, A. The Catalase–Hydrogen Peroxide System. Kinetics of Catalatic Action at  
268 High Substrate Concentrations. *Biochem. J.* **1968**, *110* (4), 617–620.  
269 <https://doi.org/10.1042/bj1100617>.

- 270 (18) Hatzis, C.; Godleski, J. J.; González-Flecha, B.; Wolfson, J. M.; Koutrakis, P. Ambient Particulate  
271 Matter Exhibits Direct Inhibitory Effects on Oxidative Stress Enzymes. *Environ. Sci. Technol.*  
272 **2006**, *40* (8), 2805–2811. <https://doi.org/10.1021/es0518732>.
- 273 (19) Forman, H. J.; Davies, K. J. A.; Ursini, F. How Do Nutritional Antioxidants Really Work:  
274 Nucleophilic Tone and Para-Hormesis versus Free Radical Scavenging in Vivo. *Free Radic. Biol.*  
275 *Med.* **2014**, *66*, 24–35. <https://doi.org/10.1016/j.freeradbiomed.2013.05.045>.
- 276 (20) Sies, H.; Berndt, C.; Jones, D. P. Oxidative Stress. *Annu. Rev. Biochem.* **2017**, *86*, 715–748.  
277 <https://doi.org/10.1146/annurev-biochem-061516-045037>.
- 278 (21) Pryor, W. A. Oxy-Radicals and Related Species: Their Formation, Lifetimes, and Reactions. *Annu.*  
279 *Rev. Physiol.* **1986**, *48* (1), 657–667.
- 280 (22) Holbrook, S. R.; Muskal, S. M.; Kim, S.-H. Predicting Surface Exposure of Amino Acids from  
281 Protein Sequence. *Protein Eng. Des. Sel.* **1990**, *3* (8), 659–665.  
282 <https://doi.org/10.1093/protein/3.8.659>.
- 283 (23) Milo, R. What Is the Total Number of Protein Molecules per Cell Volume? A Call to Rethink Some  
284 Published Values. *BioEssays* **2013**, *35* (12), 1050–1055.  
285 <https://doi.org/10.1002/bies.201300066>.
- 286 (24) Brown, G. C. Total Cell Protein Concentration as an Evolutionary Constraint on the Metabolic  
287 Control Distribution in Cells. *J. Theor. Biol.* **1991**, *153* (2), 195–203.  
288 [https://doi.org/10.1016/S0022-5193\(05\)80422-9](https://doi.org/10.1016/S0022-5193(05)80422-9).
- 289 (25) Ghio, A. J.; Richards, J. H.; Dittrich, K. L.; Samet, J. M. Metal Storage and Transport Proteins  
290 Increase After Exposure of the Rat Lung to an Air Pollution Particle. *Toxicol. Pathol.* **1998**, *26* (3),  
291 388–394. <https://doi.org/10.1177/019262339802600313>.
- 292 (26) Lippmann, M.; Yeates, D. B.; Albert, R. E. Deposition, Retention, and Clearance of Inhaled  
293 Particles. *Occup. Environ. Med.* **1980**, *37* (4), 337–362. <https://doi.org/10.1136/oem.37.4.337>.
- 294 (27) Sarangapani, R. The Role of Dispersion in Particle Deposition in Human Airways. *Toxicol. Sci.*  
295 **2000**, *54* (1), 229–236. <https://doi.org/10.1093/toxsci/54.1.229>.
- 296 (28) Walters, D. V. Lung Lining Liquid – The Hidden Depths. *Neonatology* **2002**, *81* (1), 2–5.  
297 <https://doi.org/10.1159/000056764>.
- 298 (29) Charrier, J. G.; McFall, A. S.; Richards-Henderson, N. K.; Anastasio, C. Hydrogen Peroxide  
299 Formation in a Surrogate Lung Fluid by Transition Metals and Quinones Present in Particulate  
300 Matter. *Environ. Sci. Technol.* **2014**, *48* (12), 7010–7017. <https://doi.org/10.1021/es501011w>.
- 301 (30) Charrier, J. G.; Anastasio, C. Impacts of Antioxidants on Hydroxyl Radical Production from  
302 Individual and Mixed Transition Metals in a Surrogate Lung Fluid. *Atmos. Environ.* **2011**, *45* (40),  
303 7555–7562. <https://doi.org/10.1016/j.atmosenv.2010.12.021>.
- 304 (31) Gonzalez, D. H.; Diaz, D. A.; Baumann, J. P.; Ghio, A. J.; Paulson, S. E. Effects of Albumin,  
305 Transferrin and Humic-like Substances on Iron-Mediated OH Radical Formation in Human Lung  
306 Fluids. *Free Radic. Biol. Med.* **2021**, *165*, 79–87.  
307 <https://doi.org/10.1016/j.freeradbiomed.2021.01.021>.
- 308 (32) Wang, Y.; Kim, H.; Paulson, S. E. Hydrogen Peroxide Generation from  $\alpha$ - and  $\beta$ -Pinene and  
309 Toluene Secondary Organic Aerosols. *Atmos. Environ.* **2011**, *45* (18), 3149–3156.  
310 <https://doi.org/10.1016/j.atmosenv.2011.02.060>.
- 311 (33) Tong, H.; Arangio, A. M.; Lakey, P. S. J.; Berkemeier, T.; Liu, F.; Kampf, C. J.; Brune, W. H.; Pöschl,  
312 U.; Shiraiwa, M. Hydroxyl Radicals from Secondary Organic Aerosol Decomposition in Water.  
313 *Atmospheric Chem. Phys.* **2016**, *16* (3), 1761–1771. <https://doi.org/10.5194/acp-16-1761-2016>.
- 314 (34) Tong, H.; Lakey, P. S. J.; Arangio, A. M.; Socorro, J.; Kampf, C. J.; Berkemeier, T.; Brune, W. H.;  
315 Pöschl, U.; Shiraiwa, M. Reactive Oxygen Species Formed in Aqueous Mixtures of Secondary  
316 Organic Aerosols and Mineral Dust Influencing Cloud Chemistry and Public Health in the  
317 Anthropocene. *Faraday Discuss.* **2017**, *200*, 251–270. <https://doi.org/10.1039/C7FD00023E>.

- 318 (35) Holma, B. Influence of Buffer Capacity and PH-Dependent Rheological Properties of Respiratory  
319 Mucus on Health Effects Due to Acidic Pollution. *Sci. Total Environ.* **1985**, *41* (2), 101–123.  
320 [https://doi.org/10.1016/0048-9697\(85\)90181-0](https://doi.org/10.1016/0048-9697(85)90181-0).
- 321 (36) Holma, B. Effects of Inhaled Acids on Airway Mucus and Its Consequences for Health. *Env.*  
322 *Health Perspect* **1989**, No. 79, 109–113.
- 323 (37) Hunt, J. F.; Fang, K.; Malik, R.; Snyder, A.; Malhotra, N.; Platts-Mills, T. A. E.; Gaston, B.  
324 Endogenous Airway Acidification: Implications for Asthma Pathophysiology. *Am. J. Respir. Crit.*  
325 *Care Med.* **2000**, *161* (3), 694–699. <https://doi.org/10.1164/ajrccm.161.3.9911005>.
- 326 (38) Ricciardolo, F. L. M.; Gaston, B.; Hunt, J. Acid Stress in the Pathology of Asthma. *J. Allergy Clin.*  
327 *Immunol.* **2004**, *113* (4), 610–619. <https://doi.org/10.1016/j.jaci.2003.12.034>.
- 328 (39) Tate, S.; MacGregor, G.; Davis, M.; Innes, J.; Greening, A. Airways in Cystic Fibrosis Are Acidified:  
329 Detection by Exhaled Breath Condensate. *Thorax* **2002**, *57* (11), 926–929.
- 330 (40) Fang, T.; Guo, H.; Zeng, L.; Verma, V.; Nenes, A.; Weber, R. J. Highly Acidic Ambient Particles,  
331 Soluble Metals, and Oxidative Potential: A Link between Sulfate and Aerosol Toxicity. *Environ.*  
332 *Sci. Technol.* **2017**, *51* (5), 2611–2620. <https://doi.org/10.1021/acs.est.6b06151>.
- 333 (41) Hug, S. J.; Leupin, O. Iron-Catalyzed Oxidation of Arsenic(III) by Oxygen and by Hydrogen  
334 Peroxide: PH-Dependent Formation of Oxidants in the Fenton Reaction. *Environ. Sci. Technol.*  
335 **2003**, *37* (12), 2734–2742. <https://doi.org/10.1021/es026208x>.
- 336 (42) Bataineh, H.; Pestovsky, O.; Bakac, A. PH-Induced Mechanistic Changeover from Hydroxyl  
337 Radicals to Iron(IV) in the Fenton Reaction. *Chem. Sci.* **2012**, *3* (5), 1594.  
338 <https://doi.org/10.1039/c2sc20099f>.
- 339 (43) Qiu, J.; Tonokura, K.; Enami, S. Proton-Catalyzed Decomposition of  $\alpha$ -Hydroxyalkyl-  
340 Hydroperoxides in Water. *Environ. Sci. Technol.* **2020**, *54* (17), 10561–10569.  
341 <https://doi.org/10.1021/acs.est.0c03438>.
- 342 (44) Enami, S. Fates of Organic Hydroperoxides in Atmospheric Condensed Phases. *J. Phys. Chem. A*  
343 **2021**, *125* (21), 4513–4523. <https://doi.org/10.1021/acs.jpca.1c01513>.
- 344 (45) Saunders, S. M.; Jenkin, M. E.; Derwent, R. G.; Pilling, M. J. Protocol for the Development of the  
345 Master Chemical Mechanism, MCM v3 (Part A): Tropospheric Degradation of Non-Aromatic  
346 Volatile Organic Compounds. *Atmos Chem Phys* **2003**, *3* (1), 161–180.  
347 <https://doi.org/10.5194/acp-3-161-2003>.
- 348 (46) Jenkin, M. E.; Saunders, S. M.; Wagner, V.; Pilling, M. J. Protocol for the Development of the  
349 Master Chemical Mechanism, MCM v3 (Part B): Tropospheric Degradation of Aromatic Volatile  
350 Organic Compounds. *Part B* **2003**, *3* (1), 181–193. <https://doi.org/10.5194/acp-3-181-2003>.
- 351 (47) Buxton, G. V.; Greenstock, C. L.; Helman, W. P.; Ross, A. B. Critical Review of Rate Constants for  
352 Reactions of Hydrated Electrons, Hydrogen Atoms and Hydroxyl Radicals ( $\cdot\text{OH}/\cdot\text{O}^-$  in Aqueous  
353 Solution. *J. Phys. Chem. Ref. Data* **1988**, *17* (2), 513–886. <https://doi.org/10.1063/1.555805>.
- 354 (48) Hoffman, M. Z.; Hayon, E. Pulse Radiolysis Study of Sulfhydryl Compounds in Aqueous Solution.  
355 *J. Phys. Chem.* **1973**, *77* (8), 990–996. <https://doi.org/10.1021/j100627a005>.
- 356 (49) Zhao, M. J.; Jung, L.; Tanielian, C.; Mechin, R. Kinetics of the Competitive Degradation of  
357 Deoxyribose and Other Biomolecules by Hydroxyl Radicals Produced by the Fenton Reaction.  
358 *Free Radic. Res.* **1994**, *20* (6), 345–363. <https://doi.org/10.3109/10715769409145635>.
- 359 (50) Kanofsky, J. R.; Sima, P. D. Reactive Absorption of Ozone by Aqueous Biomolecule Solutions:  
360 Implications for the Role of Sulfhydryl Compounds as Targets for Ozone. *Arch. Biochem. Biophys.*  
361 **1995**, *316* (1), 52–62. <https://doi.org/10.1006/abbi.1995.1009>.
- 362 (51) Pryor, W. A.; Giamalva, D. H.; Church, D. F. Kinetics of Ozonation. 2. Amino Acids and Model  
363 Compounds in Water and Comparisons to Rates in Nonpolar Solvents. *J. Am. Chem. Soc.* **1984**,  
364 *106* (23), 7094–7100. <https://doi.org/10.1021/ja00335a038>.

- 365 (52) Kim, H. I.; Kim, H.; Shin, Y. S.; Beegle, L. W.; Jang, S. S.; Neidholdt, E. L.; Goddard, W. A.; Heath, J.  
366 R.; Kanik, I.; Beauchamp, J. L. Interfacial Reactions of Ozone with Surfactant Protein B in a Model  
367 Lung Surfactant System. *J. Am. Chem. Soc.* **2010**, *132* (7), 2254–2263.  
368 <https://doi.org/10.1021/ja908477w>.
- 369 (53) Hasson, A. S.; Ho, A. W.; Kuwata, K. T.; Paulson, S. E. Production of Stabilized Criegee  
370 Intermediates and Peroxides in the Gas Phase Ozonolysis of Alkenes: 2. Asymmetric and  
371 Biogenic Alkenes. *J. Geophys. Res. Atmospheres* **2001**, *106* (D24), 34143–34153.  
372 <https://doi.org/10.1029/2001JD000598>.
- 373 (54) Hewitt, C. N.; Kok, G. L. Formation and Occurrence of Organic Hydroperoxides in the  
374 Troposphere: Laboratory and Field Observations. *J. Atmospheric Chem.* **1991**, *12* (2), 181–194.  
375 <https://doi.org/10.1007/BF00115779>.
- 376 (55) Zhou, Z.; Abbatt, J. P. D. Formation of Gas-Phase Hydrogen Peroxide via Multiphase Ozonolysis  
377 of Unsaturated Lipids. *Environ. Sci. Technol. Lett.* **2021**, *8* (2), 114–120.  
378 <https://doi.org/10.1021/acs.estlett.0c00757>.
- 379 (56) Navarrete, M.; Rangel, C.; Corchado, J. C.; Espinosa-García, J. Trapping of the OH Radical by  $\alpha$ -  
380 Tocopherol: A Theoretical Study. *J. Phys. Chem. A* **2005**, *109* (21), 4777–4784.  
381 <https://doi.org/10.1021/jp050717e>.
- 382 (57) Kermani, S.; Ben-Jebria, A.; Ultman, J. S. Kinetics of Ozone Reaction with Uric Acid, Ascorbic  
383 Acid, and Glutathione at Physiologically Relevant Conditions. *Arch. Biochem. Biophys.* **2006**, *451*  
384 (1), 8–16. <https://doi.org/10.1016/j.abb.2006.04.015>.
- 385 (58) Rush, J. D.; Bielski, B. H. J. Pulse Radiolytic Studies of the Reaction of Perhydroxyl/Superoxide  
386 O<sub>2</sub><sup>-</sup> with Iron(II)/Iron(III) Ions. The Reactivity of HO<sub>2</sub>/O<sub>2</sub><sup>-</sup> with Ferric Ions and Its Implication on  
387 the Occurrence of the Haber-Weiss Reaction. *J. Phys. Chem.* **1985**, *89* (23), 5062–5066.  
388 <https://doi.org/10.1021/j100269a035>.
- 389 (59) Christensen, H.; Sehested, K.; Corfitzen, H. Reactions of Hydroxyl Radicals with Hydrogen  
390 Peroxide at Ambient and Elevated Temperatures. *J. Phys. Chem.* **1982**, *86* (9), 1588–1590.  
391 <https://doi.org/10.1021/j100206a023>.
- 392 (60) Sehested, K.; Rasmussen, O. L.; Fricke, H. Rate Constants of OH with HO<sub>2</sub>, O<sub>2</sub><sup>-</sup>, and H<sub>2</sub>O<sub>2</sub><sup>+</sup> from  
393 Hydrogen Peroxide Formation in Pulse-Irradiated Oxygenated Water. *J. Phys. Chem.* **1968**, *72*  
394 (2), 626–631. <https://doi.org/10.1021/j100848a040>.
- 395 (61) Koppenol, W. H. The Haber-Weiss Cycle – 70 Years Later. *Redox Rep.* **2001**, *6* (4), 229–234.  
396 <https://doi.org/10.1179/135100001101536373>.
- 397 (62) Jayson, G. G.; Parsons, B. J.; Swallow, A. J. Oxidation of Ferrous Ions by Perhydroxyl Radicals. *J.*  
398 *Chem. Soc. Faraday Trans. 1 Phys. Chem. Condens. Phases* **1973**, *69*, 236–242.  
399 <https://doi.org/10.1039/f19736900236>.
- 400 (63) Lewis, S.; Lynch, A.; Bachas, L.; Hampson, S.; Ormsbee, L.; Bhattacharyya, D. Chelate-Modified  
401 Fenton Reaction for the Degradation of Trichloroethylene in Aqueous and Two-Phase Systems.  
402 *Environ. Eng. Sci.* **2009**, *26* (4), 849–859. <https://doi.org/10.1089/ees.2008.0277>.
- 403 (64) Stuglik, Z.; Paweł Zagórski, Z. Pulse Radiolysis of Neutral Iron(II) Solutions: Oxidation of Ferrous  
404 Ions by OH Radicals. *Radiat. Phys. Chem.* **1977** **1981**, *17* (4), 229–233.  
405 [https://doi.org/10.1016/0146-5724\(81\)90336-8](https://doi.org/10.1016/0146-5724(81)90336-8).
- 406 (65) Masuda, T.; Shinohara, H.; Kondo, M. Reactions of Hydroxyl Radicals with Nucleic Acid Bases  
407 and the Related Compounds in Gamma-Irradiated Aqueous Solution. *J. Radiat. Res. (Tokyo)*  
408 **1978**, *16* (3), 153–161.
- 409 (66) Liphard, M.; Bothe, E.; Schulte-Frohlinde, D. The Influence of Glutathione on Single-Strand  
410 Breakage in Single-Stranded DNA Irradiated in Aqueous Solution in the Absence and Presence of  
411 Oxygen. *Int. J. Radiat. Biol.* **1990**, *58* (4), 589–602.  
412 <https://doi.org/10.1080/09553009014551951>.

- 413 (67) Carr, A.; Lykkesfeldt, J. *Vitamin C in Health and Disease*; MDPI-Multidisciplinary Digital  
414 Publishing Institute, 2018.
- 415 (68) Shen, J.; Griffiths, P. T.; Campbell, S. J.; Utinger, B.; Kalberer, M.; Paulson, S. E. Ascorbate  
416 Oxidation by Iron, Copper and Reactive Oxygen Species: Review, Model Development, and  
417 Derivation of Key Rate Constants. *Sci. Rep.* **2021**, *11* (1), 7417. [https://doi.org/10.1038/s41598-](https://doi.org/10.1038/s41598-021-86477-8)  
418 [021-86477-8](https://doi.org/10.1038/s41598-021-86477-8).
- 419 (69) Adams, G. E.; Boag, J. W.; Currant, J.; Michael, B. D. *Absolute Rate Constants for the Reaction of*  
420 *the Hydroxyl Radical with Organic Compounds*; Pulse Radiolysis, 1965.
- 421 (70) Goldstein, S.; Lind, J.; Merenyi, G. Reaction of Organic Peroxyl Radicals with  $\cdot\text{NO}_2$  and  $\cdot\text{NO}$  in  
422 Aqueous Solution: Intermediacy of Organic Peroxynitrate and Peroxynitrite Species. *J. Phys.*  
423 *Chem. A* **2004**, *108* (10), 1719–1725. <https://doi.org/10.1021/jp037431z>.
- 424 (71) Jones, C. M.; Lawrence, A.; Wardman, P.; Burkitt, M. J. Electron Paramagnetic Resonance Spin  
425 Trapping Investigation into the Kinetics of Glutathione Oxidation by the Superoxide Radical: Re-  
426 Evaluation of the Rate Constant. *Free Radic. Biol. Med.* **2002**, *32* (10), 982–990.  
427 [https://doi.org/10.1016/S0891-5849\(02\)00791-8](https://doi.org/10.1016/S0891-5849(02)00791-8).
- 428 (72) Winterbourn, C. C.; Metodiewa, D. The Reaction of Superoxide with Reduced Glutathione. *Arch.*  
429 *Biochem. Biophys.* **1994**, *314* (2), 284–290. <https://doi.org/10.1006/abbi.1994.1444>.
- 430 (73) Wefers, H.; Sies, H. Oxidation of Glutathione by the Superoxide Radical to the Disulfide and the  
431 Sulfonate Yielding Singlet Oxygen. *Eur. J. Biochem.* **1983**, *137* (1–2), 29–36.  
432 <https://doi.org/10.1111/j.1432-1033.1983.tb07791.x>.
- 433 (74) Ford, E.; Hughes, M. N.; Wardman, P. Kinetics of the Reactions of Nitrogen Dioxide with  
434 Glutathione, Cysteine, and Uric Acid at Physiological PH. *Free Radic. Biol. Med.* **2002**, *32* (12),  
435 1314–1323. [https://doi.org/10.1016/S0891-5849\(02\)00850-X](https://doi.org/10.1016/S0891-5849(02)00850-X).
- 436 (75) Luo, D.; Smith, S. W.; Anderson, B. D. Kinetics and Mechanism of the Reaction of Cysteine and  
437 Hydrogen Peroxide in Aqueous Solution. *J. Pharm. Sci.* **2005**, *94* (2), 304–316.  
438 <https://doi.org/10.1002/jps.20253>.
- 439 (76) Winkler, B. S.; Orselli, S. M.; Rex, T. S. The Redox Couple between Glutathione and Ascorbic  
440 Acid: A Chemical and Physiological Perspective. *Free Radic. Biol. Med.* **1994**, *17* (4), 333–349.  
441 [https://doi.org/10.1016/0891-5849\(94\)90019-1](https://doi.org/10.1016/0891-5849(94)90019-1).
- 442 (77) Buettner, G. R.; Jurkiewicz, B. A. Catalytic Metals, Ascorbate and Free Radicals: Combinations to  
443 Avoid. *Radiat. Res.* **1996**, *145* (5), 532. <https://doi.org/10.2307/3579271>.
- 444 (78) Alfassi, Z. B.; Huie, R. E.; Neta, P.; Shoute, L. C. T. Temperature Dependence of the Rate  
445 Constants for Reaction of Inorganic Radicals with Organic Reductants. *J. Phys. Chem.* **1990**, *94*  
446 (25), 8800–8805. <https://doi.org/10.1021/j100388a011>.
- 447 (79) Augusto, O.; Bonini, M. G.; Amanso, A. M.; Linares, E.; Santos, C. C. X.; De Menezes, S. L.  
448 Nitrogen Dioxide and Carbonate Radical Anion: Two Emerging Radicals in Biology. *Free Radic.*  
449 *Biol. Med.* **2002**, *32* (9), 841–859. [https://doi.org/10.1016/S0891-5849\(02\)00786-4](https://doi.org/10.1016/S0891-5849(02)00786-4).
- 450 (80) Goldstein, S.; Czapski, G. Reactivity of Peroxynitrite versus Simultaneous Generation of  $\cdot\text{NO}$  and  
451  $\text{O}_2^{\cdot-}$  toward NADH. *Chem. Res. Toxicol.* **2000**, *13* (8), 736–741.  
452 <https://doi.org/10.1021/tx000099n>.
- 453 (81) Graetzel, M. Pulsradiolytische Untersuchung einiger Elementarprozesse der Oxydation und  
454 Reduktion des Nitrits. *Berichte Bunsenges. Fuer Phys. Chem.* **1969**, *73* (7).
- 455 (82) Jacob, D. Heterogeneous Chemistry and Tropospheric Ozone. *Atmos. Environ.* **2000**, *34* (12–14),  
456 2131–2159. [https://doi.org/10.1016/S1352-2310\(99\)00462-8](https://doi.org/10.1016/S1352-2310(99)00462-8).
- 457 (83) Bonini, M. G.; Augusto, O. Carbon Dioxide Stimulates the Production of Thiyl, Sulfinyl, and  
458 Disulfide Radical Anion from Thiol Oxidation by Peroxynitrite. *J. Biol. Chem.* **2001**, *276* (13),  
459 9749–9754. <https://doi.org/10.1074/jbc.M008456200>.

- 460 (84) Kurz, C. R.; Kissner, R.; Nauser, T.; Perrin, D.; Koppenol, W. H. Rapid Scavenging of Peroxynitrous  
461 Acid by Monohydroascorbate. *Free Radic. Biol. Med.* **2003**, *35* (12), 1529–1537.  
462 <https://doi.org/10.1016/j.freeradbiomed.2003.08.012>.
- 463 (85) Squadrito, G. L.; Cueto, R.; Splenser, A. E.; Valavanidis, A.; Zhang, H.; Uppu, R. M.; Pryor, W. A.  
464 Reaction of Uric Acid with Peroxynitrite and Implications for the Mechanism of Neuroprotection  
465 by Uric Acid. *Arch. Biochem. Biophys.* **2000**, *376* (2), 333–337.  
466 <https://doi.org/10.1006/abbi.2000.1721>.
- 467 (86) Arana, A. A.; Artaxo, P.; Rizzo, L. V.; Bastos, W. Long Term Measurements of the Elemental  
468 Composition and Optical Properties of Aerosols in Amazonia. *E3S Web Conf.* **2013**, *1*, 03005.  
469 <https://doi.org/10.1051/e3sconf/20130103005>.
- 470 (87) Birmili, W.; Allen, A. G.; Bary, F.; Harrison, R. M. Trace Metal Concentrations and Water  
471 Solubility in Size-Fractionated Atmospheric Particles and Influence of Road Traffic. *Environ. Sci.*  
472 *Technol.* **2006**, *40* (4), 1144–1153. <https://doi.org/10.1021/es0486925>.
- 473 (88) Heal, M. R.; Hibbs, L. R.; Agius, R. M.; Beverland, I. J. Total and Water-Soluble Trace Metal  
474 Content of Urban Background PM<sub>10</sub>, PM<sub>2.5</sub> and Black Smoke in Edinburgh, UK. *Atmos. Environ.*  
475 **2005**, *39* (8), 1417–1430. <https://doi.org/10.1016/j.atmosenv.2004.11.026>.
- 476 (89) Harrison, R. M.; Yin, J. Chemical Speciation of PM<sub>2.5</sub> Particles at Urban Background and Rural  
477 Sites in the UK Atmosphere. *J. Environ. Monit.* **2010**, *12* (7), 1404–1414.  
478 <https://doi.org/10.1039/c000329h>.
- 479 (90) Maenhaut, W.; Salma, I.; Cafmeyer, J.; Annegarn, H. J.; Andreae, M. O. Regional Atmospheric  
480 Aerosol Composition and Sources in the Eastern Transvaal, South Africa, and Impact of Biomass  
481 Burning. *J. Geophys. Res. Atmospheres* **1996**, *101* (D19), 23631–23650.  
482 <https://doi.org/10.1029/95JD02930>.
- 483 (91) Artaxo, P.; Gerab, F.; Yamasoe, M. A.; Martins, J. V. Fine Mode Aerosol Composition at Three  
484 Long-Term Atmospheric Monitoring Sites in the Amazon Basin. *J. Geophys. Res.* **1994**, *99* (D11),  
485 22857–22868. <https://doi.org/10.1029/94JD01023>.
- 486 (92) Pakkanen, T. A.; Loukkola, K.; Korhonen, C. H.; Aurela, M.; Mäkelä, T.; Hillamo, R. E.; Aarnio, P.;  
487 Koskentalo, T.; Kousa, A.; Maenhaut, W. Sources and Chemical Composition of Atmospheric Fine  
488 and Coarse Particles in the Helsinki Area. *Atmos. Environ.* **2001**, *35* (32), 5381–5391.  
489 [https://doi.org/10.1016/S1352-2310\(01\)00307-7](https://doi.org/10.1016/S1352-2310(01)00307-7).
- 490 (93) Olson, D. A.; Turlington, J.; Duvall, R. M.; McDow, S. R.; Stevens, C. D.; Williams, R. Indoor and  
491 Outdoor Concentrations of Organic and Inorganic Molecular Markers: Source Apportionment of  
492 PM<sub>2.5</sub> Using Low-Volume Samples. *Atmos. Environ.* **2008**, *42* (8), 1742–1751.  
493 <https://doi.org/10.1016/j.atmosenv.2007.11.035>.
- 494 (94) Lee, P. K. H.; Brook, J. R.; Dabek-Zlotorzynska, E.; Mabury, S. A. Identification of the Major  
495 Sources Contributing to PM<sub>2.5</sub> Observed in Toronto. *Environ. Sci. Technol.* **2003**, *37* (21), 4831–  
496 4840. <https://doi.org/10.1021/es026473i>.
- 497 (95) Upadhyay, N.; Clements, A.; Fraser, M.; Herckes, P. Chemical Speciation of PM<sub>2.5</sub> and PM<sub>10</sub> in  
498 South Phoenix, AZ. *J. Air Waste Manag. Assoc.* **2011**, *61* (3), 302–310.  
499 <https://doi.org/10.3155/1047-3289.61.3.302>.
- 500 (96) Hassanvand, M. S.; Naddafi, K.; Faridi, S.; Nabizadeh, R.; Sowlat, M. H.; Momeniha, F.;  
501 Gholampour, A.; Arhami, M.; Kashani, H.; Zare, A.; Niazi, S.; Rastkari, N.; Nazmara, S.; Ghani, M.;  
502 Yunesian, M. Characterization of PAHs and Metals in Indoor/Outdoor PM<sub>10</sub>/PM<sub>2.5</sub>/PM<sub>1</sub> in a  
503 Retirement Home and a School Dormitory. *Sci. Total Environ.* **2015**, *527–528*, 100–110.  
504 <https://doi.org/10.1016/j.scitotenv.2015.05.001>.
- 505 (97) Contini, D.; Cesari, D.; Donateo, A.; Chirizzi, D.; Belosi, F. Characterization of PM<sub>10</sub> and PM<sub>2.5</sub>  
506 and Their Metals Content in Different Typologies of Sites in South-Eastern Italy. *Atmosphere*  
507 **2014**, *5* (2), 435–453. <https://doi.org/10.3390/atmos5020435>.

- 508 (98) Manousakas, M.; Papaefthymiou, H.; Eleftheriadis, K.; Katsanou, K. Determination of Water-  
509 Soluble and Insoluble Elements in PM<sub>2.5</sub> by ICP-MS. *Sci. Total Environ.* **2014**, *493*, 694–700.  
510 <https://doi.org/10.1016/j.scitotenv.2014.06.043>.
- 511 (99) Han, Y.-J.; Kim, H.-W.; Cho, S.-H.; Kim, P.-R.; Kim, W.-J. Metallic Elements in PM<sub>2.5</sub> in Different  
512 Functional Areas of Korea: Concentrations and Source Identification. *Atmospheric Res.* **2015**,  
513 *153*, 416–428. <https://doi.org/10.1016/j.atmosres.2014.10.002>.
- 514 (100) Maenhaut, W.; Raes, N.; Chi, X.; Cafmeyer, J.; Wang, W.; Salma, I. Chemical Composition and  
515 Mass Closure for Fine and Coarse Aerosols at a Kerbside in Budapest, Hungary, in Spring 2002.  
516 *X-Ray Spectrom.* **2005**, *34* (4), 290–296. <https://doi.org/10.1002/xrs.820>.
- 517 (101) Rogula-Kozłowska, W.; Błaszczak, B.; Szopa, S.; Klejnowski, K.; Sówka, I.; Zwoździak, A.;  
518 Jabłońska, M.; Mathews, B. PM<sub>2.5</sub> in the Central Part of Upper Silesia, Poland: Concentrations,  
519 Elemental Composition, and Mobility of Components. *Environ. Monit. Assess.* **2013**, *185* (1),  
520 581–601. <https://doi.org/10.1007/s10661-012-2577-1>.
- 521 (102) Morishita, M.; Keeler, G. J.; Kamal, A. S.; Wagner, J. G.; Harkema, J. R.; Rohr, A. C. Identification  
522 of Ambient PM<sub>2.5</sub> Sources and Analysis of Pollution Episodes in Detroit, Michigan Using Highly  
523 Time-Resolved Measurements. *Atmos. Environ.* **2011**, *45* (8), 1627–1637.  
524 <https://doi.org/10.1016/j.atmosenv.2010.09.062>.
- 525 (103) Chow, J. C.; Watson, J. G.; Fujita, E. M.; Lu, Z.; Lawson, D. R.; Ashbaugh, L. L. Temporal and  
526 Spatial Variations of PM<sub>2.5</sub> and PM<sub>10</sub> Aerosol in the Southern California Air Quality Study.  
527 *Atmos. Environ.* **1994**, *28* (12), 2061–2080. [https://doi.org/10.1016/1352-2310\(94\)90474-X](https://doi.org/10.1016/1352-2310(94)90474-X).
- 528 (104) Vecchi, R.; Marcazzan, G.; Valli, G.; Ceriani, M.; Antoniazzi, C. The Role of Atmospheric  
529 Dispersion in the Seasonal Variation of PM<sub>1</sub> and PM<sub>2.5</sub> Concentration and Composition in the  
530 Urban Area of Milan (Italy). *Atmos. Environ.* **2004**, *38* (27), 4437–4446.  
531 <https://doi.org/10.1016/j.atmosenv.2004.05.029>.
- 532 (105) Khodeir, M.; Shamy, M.; Alghamdi, M.; Zhong, M.; Sun, H.; Costa, M.; Chen, L.-C.; Maciejczyk, P.  
533 Source Apportionment and Elemental Composition of PM<sub>2.5</sub> and PM<sub>10</sub> in Jeddah City, Saudi  
534 Arabia. *Atmospheric Pollut. Res.* **2012**, *3* (3), 331–340. <https://doi.org/10.5094/APR.2012.037>.
- 535 (106) Hagler, G. S. W.; Bergin, M. H.; Salmon, L. G.; Yu, J. Z.; Wan, E. C. H.; Zheng, M.; Zeng, L. M.;  
536 Kiang, C. S.; Zhang, Y. H.; Schauer, J. J. Local and Regional Anthropogenic Influence on PM<sub>2.5</sub>  
537 Elements in Hong Kong. *Atmos. Environ.* **2007**, *41* (28), 5994–6004.  
538 <https://doi.org/10.1016/j.atmosenv.2007.03.012>.
- 539 (107) Loyola, J.; Arbilla, G.; Quiterio, S. L.; Escalera, V.; Minho, A. S. Trace Metals in the Urban  
540 Aerosols of Rio de Janeiro City. *J. Braz. Chem. Soc.* **2012**, *23* (4), 628–638.  
541 <https://doi.org/10.1590/S0103-50532012000400007>.
- 542 (108) Squizzato, S.; Masiol, M.; Visin, F.; Canal, A.; Rampazzo, G.; Pavoni, B. The PM<sub>2.5</sub> Chemical  
543 Composition in an Industrial Zone Included in a Large Urban Settlement: Main Sources and Local  
544 Background. *Environ. Sci. Process. Impacts* **2014**, *16* (8), 1913–1922.  
545 <https://doi.org/10.1039/C4EM00111G>.
- 546 (109) Matschullat, J.; Maenhaut, W.; Zimmermann, F.; Juliane Fiebig. Aerosol and Bulk Deposition  
547 Trends in the 1990's, Eastern Erzgebirge, Central Europe. *Atmos. Environ.* **2000**, *34* (19), 3213–  
548 3221. [https://doi.org/10.1016/S1352-2310\(99\)00516-6](https://doi.org/10.1016/S1352-2310(99)00516-6).
- 549 (110) Querol, X.; Alastuey, A.; Rodriguez, S.; Plana, F.; Ruiz, C. R.; Cots, N.; Massagué, G.; Puig, O.  
550 PM<sub>10</sub> and PM<sub>2.5</sub> Source Apportionment in the Barcelona Metropolitan Area, Catalonia, Spain.  
551 *Atmos. Environ.* **2001**, *35* (36), 6407–6419. [https://doi.org/10.1016/S1352-2310\(01\)00361-2](https://doi.org/10.1016/S1352-2310(01)00361-2).
- 552 (111) Martinez, M. A.; Caballero, P.; Carrillo, O.; Mendoza, A.; Mejia, G. M. Chemical Characterization  
553 and Factor Analysis of PM<sub>2.5</sub> in Two Sites of Monterrey, Mexico. *J. Air Waste Manag. Assoc.*  
554 **2012**, *62* (7), 817–827. <https://doi.org/10.1080/10962247.2012.681421>.

- 555 (112) Janssen, N. A. H.; Van Mansom, D. F. M.; Van Der Jagt, K.; Harssema, H.; Hoek, G. Mass  
556 Concentration and Elemental Composition of Airborne Particulate Matter at Street and  
557 Background Locations. *Atmos. Environ.* **1997**, *31* (8), 1185–1193.  
558 [https://doi.org/10.1016/S1352-2310\(96\)00291-9](https://doi.org/10.1016/S1352-2310(96)00291-9).
- 559 (113) Na, K.; Cocker, D. R. Characterization and Source Identification of Trace Elements in PM<sub>2.5</sub> from  
560 Mira Loma, Southern California. *Atmospheric Res.* **2009**, *93* (4), 793–800.  
561 <https://doi.org/10.1016/j.atmosres.2009.03.012>.
- 562 (114) Shaltout, A. A.; Boman, J.; Al-Malawi, D. R.; Shehadeh, Z. F. Elemental Composition of PM<sub>2.5</sub>  
563 Particles Sampled in Industrial and Residential Areas of Taif, Saudi Arabia. *Aerosol Air Qual. Res.*  
564 **2013**, *13* (4), 1356–1364. <https://doi.org/10.4209/aaqr.2012.11.0320>.
- 565 (115) Chow, J. C.; Watson, J. G.; Lu, Z.; Lowenthal, D. H.; Frazier, C. A.; Solomon, P. A.; Thuillier, R. H.;  
566 Magliano, K. Descriptive Analysis of PM<sub>2.5</sub> and PM<sub>10</sub> at Regionally Representative Locations  
567 during SJVAQS/AUSPEX. *Atmos. Environ.* **1996**, *30* (12), 2079–2112.  
568 [https://doi.org/10.1016/1352-2310\(95\)00402-5](https://doi.org/10.1016/1352-2310(95)00402-5).
- 569 (116) Kendall, M.; Pala, K.; Ucakli, S.; Gucer, S. Airborne Particulate Matter (PM<sub>2.5</sub> and PM<sub>10</sub>) and  
570 Associated Metals in Urban Turkey. *Air Qual. Atmosphere Health* **2011**, *4* (3–4), 235–242.  
571 <https://doi.org/10.1007/s11869-010-0129-9>.
- 572 (117) Mansha, M.; Ghauri, B.; Rahman, S.; Amman, A. Characterization and Source Apportionment of  
573 Ambient Air Particulate Matter (PM<sub>2.5</sub>) in Karachi. *Sci. Total Environ.* **2012**, *425*, 176–183.  
574 <https://doi.org/10.1016/j.scitotenv.2011.10.056>.
- 575 (118) Pant, P.; Shukla, A.; Kohl, S. D.; Chow, J. C.; Watson, J. G.; Harrison, R. M. Characterization of  
576 Ambient PM<sub>2.5</sub> at a Pollution Hotspot in New Delhi, India and Inference of Sources. *Atmos.*  
577 *Environ.* **2015**, *109*, 178–189. <https://doi.org/10.1016/j.atmosenv.2015.02.074>.
- 578 (119) Tolis, E. I.; Saraga, D. E.; Filiou, K. F.; Tziavos, N. I.; Tsioulos, C. P.; Dinas, A.; Bartzis, J. G. One-  
579 Year Intensive Characterization on PM<sub>2.5</sub> Nearby Port Area of Thessaloniki, Greece. *Environ. Sci.*  
580 *Pollut. Res.* **2015**, *22* (9), 6812–6826. <https://doi.org/10.1007/s11356-014-3883-7>.
- 581 (120) López, M. L.; Ceppi, S.; Palancar, G. G.; Olcese, L. E.; Tirao, G.; Toselli, B. M. Elemental  
582 Concentration and Source Identification of PM<sub>10</sub> and PM<sub>2.5</sub> by SR-XRF in Córdoba City,  
583 Argentina. *Atmos. Environ.* **2011**, *45* (31), 5450–5457.  
584 <https://doi.org/10.1016/j.atmosenv.2011.07.003>.
- 585 (121) Cao, L.; Zeng, J.; Liu, K.; Bao, L.; Li, Y. Characterization and Cytotoxicity of PM<sub><0.2</sub>, PM<sub>0.2–2.5</sub>  
586 and PM<sub>2.5–10</sub> around MSWI in Shanghai, China. *Int. J. Environ. Res. Public Health* **2015**, *12* (5),  
587 5076–5089. <https://doi.org/10.3390/ijerph120505076>.
- 588 (122) Yin, L.; Niu, Z.; Chen, X.; Chen, J.; Xu, L.; Zhang, F. Chemical Compositions of PM<sub>2.5</sub> Aerosol  
589 during Haze Periods in the Mountainous City of Yong'an, China. *J. Environ. Sci.* **2012**, *24* (7),  
590 1225–1233. [https://doi.org/10.1016/S1001-0742\(11\)60940-6](https://doi.org/10.1016/S1001-0742(11)60940-6).
- 591 (123) Zhou, S.; Yuan, Q.; Li, W.; Lu, Y.; Zhang, Y.; Wang, W. Trace Metals in Atmospheric Fine Particles  
592 in One Industrial Urban City: Spatial Variations, Sources, and Health Implications. *J. Environ. Sci.*  
593 **2014**, *26* (1), 205–213. [https://doi.org/10.1016/S1001-0742\(13\)60399-X](https://doi.org/10.1016/S1001-0742(13)60399-X).
- 594 (124) Wang, X.; Bi, X.; Sheng, G.; Fu, J. Chemical Composition and Sources of PM<sub>10</sub> and PM<sub>2.5</sub>  
595 Aerosols in Guangzhou, China. *Environ. Monit. Assess.* **2006**, *119* (1–3), 425–439.  
596 <https://doi.org/10.1007/s10661-005-9034-3>.
- 597 (125) Kulshrestha, A.; Satsangi, P. G.; Masih, J.; Taneja, A. Metal Concentration of PM<sub>2.5</sub> and PM<sub>10</sub>  
598 Particles and Seasonal Variations in Urban and Rural Environment of Agra, India. *Sci. Total*  
599 *Environ.* **2009**, *407* (24), 6196–6204. <https://doi.org/10.1016/j.scitotenv.2009.08.050>.
- 600 (126) Yadav, S.; Satsangi, P. G. Characterization of Particulate Matter and Its Related Metal Toxicity in  
601 an Urban Location in South West India. *Environ. Monit. Assess.* **2013**, *185* (9), 7365–7379.  
602 <https://doi.org/10.1007/s10661-013-3106-6>.



- 603 (127) Song, S.; Wu, Y.; Jiang, J.; Yang, L.; Cheng, Y.; Hao, J. Chemical Characteristics of Size-Resolved  
604 PM<sub>2.5</sub> at a Roadside Environment in Beijing, China. *Environ. Pollut.* **2012**, *161*, 215–221.  
605 <https://doi.org/10.1016/j.envpol.2011.10.014>.
- 606 (128) Sun, Y.; Zhuang, G.; Wang, Y.; Han, L.; Guo, J.; Dan, M.; Zhang, W.; Wang, Z.; Hao, Z. The Air-  
607 Borne Particulate Pollution in Beijing—Concentration, Composition, Distribution and Sources.  
608 *Atmos. Environ.* **2004**, *38* (35), 5991–6004. <https://doi.org/10.1016/j.atmosenv.2004.07.009>.
- 609 (129) See, S. W.; Balasubramanian, R.; Rianawati, E.; Karthikeyan, S.; Streets, D. G. Characterization  
610 and Source Apportionment of Particulate Matter ≤ 2.5 Mm in Sumatra, Indonesia, during a  
611 Recent Peat Fire Episode. *Environ. Sci. Technol.* **2007**, *41* (10), 3488–3494.  
612 <https://doi.org/10.1021/es061943k>.
- 613 (130) Poschl, U.; Martin, S. T.; Sinha, B.; Chen, Q.; Gunthe, S. S.; Huffman, J. A.; Borrmann, S.; Farmer,  
614 D. K.; Garland, R. M.; Helas, G.; Jimenez, J. L.; King, S. M.; Manzi, A.; Mikhailov, E.; Pauliquevis,  
615 T.; Petters, M. D.; Prenni, A. J.; Roldin, P.; Rose, D.; Schneider, J.; Su, H.; Zorn, S. R.; Artaxo, P.;  
616 Andreae, M. O. Rainforest Aerosols as Biogenic Nuclei of Clouds and Precipitation in the  
617 Amazon. *Science* **2010**, *329* (5998), 1513–1516. <https://doi.org/10.1126/science.1191056>.
- 618 (131) Jimenez, J. L.; Canagaratna, M. R.; Donahue, N. M.; Prevot, A. S. H.; Zhang, Q.; Kroll, J. H.;  
619 DeCarlo, P. F.; Allan, J. D.; Coe, H.; Ng, N. L.; Aiken, A. C.; Docherty, K. S.; Ulbrich, I. M.; Grieshop,  
620 A. P.; Robinson, A. L.; Duplissy, J.; Smith, J. D.; Wilson, K. R.; Lanz, V. A.; Hueglin, C.; Sun, Y. L.;  
621 Tian, J.; Laaksonen, A.; Raatikainen, T.; Rautiainen, J.; Vaattovaara, P.; Ehn, M.; Kulmala, M.;  
622 Tomlinson, J. M.; Collins, D. R.; Cubison, M. J.; E.; Dunlea, J.; Huffman, J. A.; Onasch, T. B.;  
623 Alfarra, M. R.; Williams, P. I.; Bower, K.; Kondo, Y.; Schneider, J.; Drewnick, F.; Borrmann, S.;  
624 Weimer, S.; Demerjian, K.; Salcedo, D.; Cottrell, L.; Griffin, R.; Takami, A.; Miyoshi, T.;  
625 Hatakeyama, S.; Shimono, A.; Sun, J. Y.; Zhang, Y. M.; Dzepina, K.; Kimmel, J. R.; Sueper, D.;  
626 Jayne, J. T.; Herndon, S. C.; Trimborn, A. M.; Williams, L. R.; Wood, E. C.; Middlebrook, A. M.;  
627 Kolb, C. E.; Baltensperger, U.; Worsnop, D. R. Evolution of Organic Aerosols in the Atmosphere.  
628 *Science* **2009**, *326* (5959), 1525–1529. <https://doi.org/10.1126/science.1180353>.
- 629 (132) Huang, R.-J.; Zhang, Y.; Bozzetti, C.; Ho, K.-F.; Cao, J.-J.; Han, Y.; Daellenbach, K. R.; Slowik, J. G.;  
630 Platt, S. M.; Canonaco, F.; Zotter, P.; Wolf, R.; Pieber, S. M.; Bruns, E. A.; Crippa, M.; Ciarelli, G.;  
631 Piazzalunga, A.; Schwikowski, M.; Abbaszade, G.; Schnelle-Kreis, J.; Zimmermann, R.; An, Z.;  
632 Szidat, S.; Baltensperger, U.; Haddad, I. E.; Prévôt, A. S. H. High Secondary Aerosol Contribution  
633 to Particulate Pollution during Haze Events in China. *Nature* **2014**, *514* (7521), 218–222.  
634 <https://doi.org/10.1038/nature13774>.
- 635 (133) Wingfors, H. Characterization of the Size-Distribution of Aerosols and Particle-Bound Content of  
636 Oxygenated PAHs, PAHs, and n-Alkanes in Urban Environments in Afghanistan. *Atmos. Environ.*  
637 **2011**, *45* (26), 4360–4369. <https://doi.org/10.1016/j.atmosenv.2011.05.049>.
- 638 (134) Valavanidis, A.; Fiotakis, K.; Vlahogianni, T.; Papadimitriou, V.; Pantikaki, V. Determination of  
639 Selective Quinones and Quinoid Radicals in Airborne Particulate Matter and Vehicular Exhaust  
640 Particles. *Environ. Chem.* **2006**, *3* (2), 118–123. <https://doi.org/10.1071/EN05089>.
- 641 (135) Eiguren-Fernandez, A.; Miguel, A. H.; Di Stefano, E.; Schmitz, D. A.; Cho, A. K.; Thurairatnam, S.;  
642 Avol, E. L.; Froines, J. R. Atmospheric Distribution of Gas- and Particle-Phase Quinones in  
643 Southern California. *Aerosol Sci. Technol.* **2008**, *42* (10), 854–861.  
644 <https://doi.org/10.1080/02786820802339546>.
- 645 (136) Delgado-Saborit, J. M.; Alam, M. S.; Godri Pollitt, K. J.; Stark, C.; Harrison, R. M. Analysis of  
646 Atmospheric Concentrations of Quinones and Polycyclic Aromatic Hydrocarbons in Vapour and  
647 Particulate Phases. *Atmos. Environ.* **2013**, *77*, 974–982.  
648 <https://doi.org/10.1016/j.atmosenv.2013.05.080>.

- 649 (137) Alam, M. S.; Delgado-Saborit, J. M.; Stark, C.; Harrison, R. M. Investigating PAH Relative  
650 Reactivity Using Congener Profiles, Quinone Measurements and Back Trajectories. *Atmospheric*  
651 *Chem. Phys.* **2014**, *14* (5), 2467–2477. <https://doi.org/10.5194/acp-14-2467-2014>.
- 652 (138) Cho, A. K.; Di Stefano, E.; You, Y.; Rodriguez, C. E.; Schmitz, D. A.; Kumagai, Y.; Miguel, A. H.;  
653 Eiguren-Fernandez, A.; Kobayashi, T.; Avol, E.; Froines, J. R. Determination of Four Quinones in  
654 Diesel Exhaust Particles, SRM 1649a, and Atmospheric PM<sub>2.5</sub> Special Issue of *Aerosol Science*  
655 *and Technology* on Findings from the Fine Particulate Matter Supersites Program. *Aerosol Sci.*  
656 *Technol.* **2004**, *38* (sup1), 68–81. <https://doi.org/10.1080/02786820390229471>.
- 657

658 **Table S1.** Chemical reactions, rate constants as used in the KM-SUB-ELF, with reference

| #                           | Reaction                                                                                                                  | Rate constant<br>( $\text{cm}^{-3} \text{s}^{-1}$ or $\text{s}^{-1}$ ) | Reference |
|-----------------------------|---------------------------------------------------------------------------------------------------------------------------|------------------------------------------------------------------------|-----------|
| <i>Gas-phase reactions</i>  |                                                                                                                           |                                                                        |           |
| 1                           | $\text{NO}^\bullet + \text{O}_3 \rightarrow \text{NO}_2^\bullet + \text{O}_2$                                             | $2.05 \times 10^{-14}$                                                 | 45,46     |
| 2                           | $\text{NO}_2^\bullet + \text{O}_3 \rightarrow \text{NO}_3^\bullet + \text{O}_2$                                           | $4.85 \times 10^{-17}$                                                 | 45,46     |
| 3                           | $\text{NO}^\bullet + \text{NO}^\bullet + \text{O}_2 \rightarrow \text{NO}_2^\bullet + \text{NO}_2^\bullet$                | $8.93 \times 10^{-20}$                                                 | 45,46     |
| 4                           | $\text{NO}^\bullet + \text{NO}_3^\bullet \rightarrow \text{NO}_2^\bullet + \text{NO}_2^\bullet$                           | $2.57 \times 10^{-11}$                                                 | 45,46     |
| 5                           | $\text{NO}_2^\bullet + \text{NO}_3^\bullet \rightarrow \text{NO}^\bullet + \text{NO}_2^\bullet + \text{O}_2$              | $7.73 \times 10^{-16}$                                                 | 45,46     |
| 6                           | $\text{NO}_2^\bullet + \text{NO}_3^\bullet \rightarrow \text{N}_2\text{O}_5$                                              | $1.21 \times 10^{-12}$                                                 | 45,46     |
| 7                           | $\bullet\text{OH} + \text{O}_3 \rightarrow \text{HO}_2^\bullet + \text{O}_2$                                              | $8.20 \times 10^{-14}$                                                 | 45,46     |
| 8                           | $\bullet\text{OH} + \text{H}_2\text{O}_2 \rightarrow \text{HO}_2^\bullet + \text{H}_2\text{O}$                            | $1.73 \times 10^{-12}$                                                 | 45,46     |
| 9                           | $\text{HO}_2^\bullet + \text{O}_3 \rightarrow \bullet\text{OH} + \text{O}_2 + \text{O}_2$                                 | $8.24 \times 10^{-16}$                                                 | 45,46     |
| 10                          | $\bullet\text{OH} + \text{HO}_2^\bullet \rightarrow \text{H}_2\text{O} + \text{O}_2$                                      | $1.08 \times 10^{-10}$                                                 | 45,46     |
| 11                          | $\text{HO}_2^\bullet + \text{HO}_2^\bullet \rightarrow \text{H}_2\text{O}_2 + \text{O}_2$                                 | $5.09 \times 10^{-12}$                                                 | 45,46     |
| 12                          | $\text{HO}_2^\bullet + \text{HO}_2^\bullet \rightarrow \text{H}_2\text{O}_2$                                              | $3.50 \times 10^{-12}$                                                 | 45,46     |
| 13                          | $\bullet\text{OH} + \text{NO}^\bullet \rightarrow \text{HONO}$                                                            | $8.91 \times 10^{-12}$                                                 | 45,46     |
| 14                          | $\bullet\text{OH} + \text{NO}_2^\bullet \rightarrow \text{HNO}_3$                                                         | $8.91 \times 10^{-12}$                                                 | 45,46     |
| 15                          | $\bullet\text{OH} + \text{NO}_3^\bullet \rightarrow \text{HO}_2^\bullet + \text{NO}_2^\bullet$                            | $2.00 \times 10^{-11}$                                                 | 45,46     |
| 16                          | $\text{HO}_2^\bullet + \text{NO}^\bullet \rightarrow \bullet\text{OH} + \text{NO}_2^\bullet$                              | $8.24 \times 10^{-12}$                                                 | 45,46     |
| 17                          | $\text{HO}_2^\bullet + \text{NO}_2^\bullet \rightarrow \text{HO}_2\text{NO}_2$                                            | $6.87 \times 10^{-13}$                                                 | 45,46     |
| 18                          | $\text{HO}_2\text{NO}_2 \rightarrow \text{HO}_2^\bullet + \text{NO}_2^\bullet$                                            | $2.49 \times 10^{-1}$                                                  | 45,46     |
| 19                          | $\bullet\text{OH} + \text{HO}_2\text{NO}_2 \rightarrow \text{NO}_2^\bullet + \text{H}_2\text{O} + \text{O}_2$             | $2.96 \times 10^{-12}$                                                 | 45,46     |
| 20                          | $\text{HO}_2^\bullet + \text{NO}_3^\bullet \rightarrow \bullet\text{OH} + \text{NO}_2^\bullet$                            | $4.00 \times 10^{-12}$                                                 | 45,46     |
| 21                          | $\bullet\text{OH} + \text{HONO} \rightarrow \text{NO}_2^\bullet + \text{H}_2\text{O}$                                     | $5.78 \times 10^{-12}$                                                 | 45,46     |
| 22                          | $\bullet\text{OH} + \text{HNO}_3 \rightarrow \text{NO}_3^\bullet + \text{H}_2\text{O}$                                    | $1.37 \times 10^{-13}$                                                 | 45,46     |
| 23                          | $\text{N}_2\text{O}_5 \rightarrow \text{NO}_2^\bullet + \text{NO}_3^\bullet$                                              | $1.83 \times 10^{-1}$                                                  | 45,46     |
| <i>Surfactant reactions</i> |                                                                                                                           |                                                                        |           |
| 24                          | $\text{SPB} + \bullet\text{OH} \rightarrow \text{SPB-ox}$                                                                 | $1.70 \times 10^{-11}$                                                 | 47–49     |
| 25                          | $\text{POG} + \bullet\text{OH} \rightarrow \text{POG-ox}$                                                                 | $1.70 \times 10^{-11}$                                                 | 1         |
| 26                          | $\text{SPB} + \text{O}_3 \rightarrow \text{SPB-ox}$                                                                       | $1.00 \times 10^{-14}$                                                 | 50,51     |
| 27                          | $\text{POG} + \text{O}_3 \rightarrow \text{POG-ox} + 0.17 \text{H}_2\text{O}_2$                                           | $1.66 \times 10^{-16}$                                                 | 52–55     |
| 28                          | $\text{aToc} + \text{OH} \rightarrow \text{aToc-ox}$                                                                      | $4.50 \times 10^{-13}$                                                 | 56        |
| 29                          | $\text{aToc} + \text{O}_3 \rightarrow \text{aToc-ox}$                                                                     | $1.20 \times 10^{-18}$                                                 | 57        |
| <i>ELF reactions</i>        |                                                                                                                           |                                                                        |           |
| 30                          | $\text{O}_2^\bullet + \text{HO}_2 + \text{H}_2\text{O} \rightarrow \text{H}_2\text{O}_2 + \text{OH}^\bullet + \text{O}_2$ | $1.70 \times 10^{-13}$                                                 | 1,58      |
| 31                          | $\text{HO}_2 + \text{HO}_2 \rightarrow \text{H}_2\text{O}_2 + \text{O}_2$                                                 | $1.40 \times 10^{-15}$                                                 | 58        |

|    |                                                                      |                        |      |
|----|----------------------------------------------------------------------|------------------------|------|
| 32 | $O_2^{\bullet-} + O_2^{\bullet-} + 2H^+ \rightarrow H_2O_2 + O_2$    | $3.82 \times 10^{-16}$ | 58   |
| 33 | $H_2O_2 + \bullet OH \rightarrow HO_2 + H_2O$                        | $5.50 \times 10^{-14}$ | 59   |
| 34 | $\bullet OH + \bullet OH \rightarrow H_2O_2$                         | $8.60 \times 10^{-12}$ | 60   |
| 35 | $\bullet OH + O_2^{\bullet-} \rightarrow O_2 + OH^-$                 | $1.30 \times 10^{-11}$ | 47   |
| 36 | $\bullet OH + HO_2 \rightarrow H_2O + O_2$                           | $1.20 \times 10^{-11}$ | 60   |
| 37 | $H_2O_2 + HO_2 \rightarrow \bullet OH + O_2 + H_2O$                  | $4.98 \times 10^{-21}$ | 61   |
| 38 | $Fe^{2+} + O_2^{\bullet-} + 2H^+ \rightarrow Fe^{3+} + H_2O_2$       | $3.10 \times 10^{-14}$ | 1,58 |
| 39 | $Fe^{2+} + HO_2 + H^+ \rightarrow Fe^{3+} + H_2O_2$                  | $1.99 \times 10^{-15}$ | 62   |
| 40 | $Fe^{2+} + H_2O_2 \rightarrow Fe^{3+} + \bullet OH + OH^-$           | $4.30 \times 10^{-18}$ | 63   |
| 41 | $Fe^{2+} + \bullet OH \rightarrow Fe^{3+} + OH^-$                    | $5.30 \times 10^{-13}$ | 64   |
| 42 | $Fe^{2+} + H_2O_2 \rightarrow Fe^{4+} + H_2O$                        | $9.50 \times 10^{-18}$ | 1    |
| 43 | $Fe^{3+} + H_2O_2 \rightarrow Fe^{2+} + HO_2 + H^+$                  | $3.32 \times 10^{-24}$ | 63   |
| 44 | $Fe^{3+} + HO_2 \rightarrow Fe^{2+} + O_2 + H^+$                     | $3.30 \times 10^{-18}$ | 58   |
| 45 | $Fe^{4+} + Fe^{2+} \rightarrow Fe^{3+} + Fe^{3+}$                    | $6.60 \times 10^{-18}$ | 41   |
| 46 | $Fe^{3+} + AscH \rightarrow Fe^{2+} + Asc^{\bullet}$                 | $1.10 \times 10^{-19}$ | 1    |
| 47 | $Fe^{4+} + AscH \rightarrow Fe^{3+} + Asc^{\bullet}$                 | $7.60 \times 10^{-19}$ | 1    |
| 48 | $Fe^{2+} + O_2 \rightarrow O_2^{\bullet-} + Fe^{3+}$                 | $5.20 \times 10^{-21}$ | 1    |
| 49 | $Cu^+ + HO_2 + H^+ \rightarrow Cu^{2+} + H_2O_2$                     | $2.30 \times 10^{-12}$ | 1    |
| 50 | $Cu^+ + O_2^{\bullet-} + H_2O \rightarrow Cu^{2+} + H_2O_2 + OH^-$   | $5.80 \times 10^{-15}$ | 1    |
| 51 | $Cu^{2+} + HO_2 \rightarrow Cu^+ + O_2 + H^+$                        | $1.60 \times 10^{-11}$ | 1    |
| 52 | $Cu^{2+} + O_2^{\bullet-} \rightarrow Cu^+ + O_2$                    | $8.30 \times 10^{-12}$ | 1    |
| 53 | $Cu^{2+} + AscH \rightarrow Cu^+ + Asc^{\bullet}$                    | $1.40 \times 10^{-18}$ | 1    |
| 54 | $Cu^+ + O_2 \rightarrow Cu^{2+} + O_2^{\bullet-}$                    | $6.90 \times 10^{-20}$ | 1    |
| 55 | $Cu^+ + H_2O_2 \rightarrow Cu^{2+} + \bullet OH + OH^-$              | $2.40 \times 10^{-20}$ | 1    |
| 56 | $Cu^+ + H_2O_2 \rightarrow Cu^{3+} + OH^- + OH^-$                    | $5.00 \times 10^{-19}$ | 1    |
| 57 | $Cu^+ + Cu^{3+} \rightarrow Cu^{2+} + Cu^{2+}$                       | $5.80 \times 10^{-12}$ | 1    |
| 58 | $Cu^{2+} + H_2O_2 \rightarrow Cu^+ + O_2^{\bullet-} + H^+$           | $3.80 \times 10^{-24}$ | 1    |
| 59 | $PQN + AscH \rightarrow PQN^{\bullet} + Asc^{\bullet}$               | $1.20 \times 10^{-20}$ | 29   |
| 60 | $PQN^{\bullet} + O_2 \rightarrow PQN + O_2^{\bullet-}$               | $4.60 \times 10^{-13}$ | 1    |
| 61 | $PQN^{\bullet} + O_2^{\bullet-} + 2H^+ \rightarrow PQN + H_2O_2$     | $3.30 \times 10^{-12}$ | 1    |
| 62 | $NQN12 + AscH \rightarrow NQN12^{\bullet} + Asc^{\bullet}$           | $1.50 \times 10^{-19}$ | 29   |
| 63 | $NQN12^{\bullet} + O_2 \rightarrow NQN12 + O_2^{\bullet-}$           | $4.60 \times 10^{-13}$ | 1    |
| 64 | $NQN12^{\bullet} + O_2^{\bullet-} + 2H^+ \rightarrow NQN12 + H_2O_2$ | $3.30 \times 10^{-12}$ | 1    |
| 65 | $NQN14 + AscH \rightarrow NQN14^{\bullet} + Asc^{\bullet}$           | $6.30 \times 10^{-21}$ | 29   |
| 66 | $NQN14^{\bullet} + O_2 \rightarrow NQN14 + O_2^{\bullet-}$           | $4.60 \times 10^{-13}$ | 1    |
| 67 | $NQN14^{\bullet} + O_2^{\bullet-} + 2H^+ \rightarrow NQN14 + H_2O_2$ | $3.30 \times 10^{-12}$ | 1    |
| 68 | $UA + O_3 \rightarrow \text{Products}$                               | $9.60 \times 10^{-17}$ | 57   |

|     |                                                               |                        |                               |
|-----|---------------------------------------------------------------|------------------------|-------------------------------|
| 69  | $UA + \cdot OH \rightarrow \text{Products} + OH^-$            | $1.20 \times 10^{-11}$ | 65                            |
| 70  | $GSH + \cdot OH \rightarrow \text{Products} + OH^-$           | $1.50 \times 10^{-11}$ | 66                            |
| 71  | $GSSG + \cdot OH \rightarrow \text{Products} + OH^-$          | $1.50 \times 10^{-11}$ | Assumed to be the same as R67 |
| 72  | $Asc\cdot + Asc\cdot + H^+ \rightarrow AscH + DHA$            | $5.00 \times 10^{-16}$ | 67                            |
| 73  | $AscH + O_2^{\cdot-} + H^+ \rightarrow Asc\cdot + H_2O_2$     | $5.10 \times 10^{-17}$ | 1                             |
| 74  | $AscH + HO_2 \rightarrow Asc\cdot + H_2O_2$                   | $2.65 \times 10^{-17}$ | 68                            |
| 75  | $AscH + \cdot OH \rightarrow \text{Products} + OH^-$          | $1.80 \times 10^{-11}$ | 69                            |
| 76  | $AscH + \cdot O_3 \rightarrow \text{Products}$                | $9.10 \times 10^{-17}$ | 57                            |
| 77  | $1.25 GS^- + 0.5 O_3 \rightarrow \text{Products}$             | $9.60 \times 10^{-20}$ | 57                            |
| 78  | $1.25 GSH + 0.5 O_3 \rightarrow \text{Products}$              | $9.60 \times 10^{-20}$ | 57                            |
| 79  | $GSOO + GSOO \rightarrow 0.56 O_2^{\cdot-} + \text{Products}$ | $6.79 \times 10^{-13}$ | 70                            |
| 80  | $O_2^{\cdot-} + GSH \rightarrow GSO\cdot + OH^-$              | $3.32 \times 10^{-19}$ | 71-73                         |
| 81  | $NO_2^{\cdot} + GS\cdot \rightarrow GSNO_2$                   | $4.98 \times 10^{-12}$ | 4                             |
| 82  | $GSOO\cdot + NO_2^{\cdot} \rightarrow GSOONO_2$               | $2.49 \times 10^{-12}$ | 70                            |
| 83  | $GSOONO_2 \rightarrow GSOO\cdot + NO_2^{\cdot}$               | $7.5 \times 10^{-1}$   | 70                            |
| 84  | $NO_2^{\cdot} + GS^- \rightarrow NO_2^- + GS\cdot$            | $4.00 \times 10^{-13}$ | 4                             |
| 85  | $NO_2^{\cdot} + GSH \rightarrow NO_2^- + GS\cdot + H^+$       | $1.66 \times 10^{-14}$ | 74                            |
| 86  | $GSOO\cdot + GSH \rightarrow GSO\cdot + GSOH$                 | $3.32 \times 10^{-15}$ | 4                             |
| 87  | $GSO + NO_2 \rightarrow GSOONO$                               | $7.47 \times 10^{-12}$ | 4                             |
| 88  | $GSOONO \rightarrow \text{Products}$                          | $7.00 \times 10^2$     | 4                             |
| 89  | $GS\cdot + GS^- \rightarrow GSSG\cdot$                        | $1.59 \times 10^{-14}$ | 4,5                           |
| 90  | $GSSG\cdot \rightarrow GS\cdot + GS^-$                        | $1.60 \times 10^5$     | 4,5                           |
| 91  | $GSSG\cdot + O_2 \rightarrow GSSG + O_2^{\cdot-}$             | $8.30 \times 10^{-12}$ | 4,5                           |
| 92  | $GS\cdot + GS\cdot \rightarrow GSSG$                          | $8.30 \times 10^{-12}$ | 5                             |
| 93  | $GSOH + GSH \rightarrow GSSG + H_2O$                          | $1.20 \times 10^{-18}$ | 75                            |
| 94  | $GSO\cdot + GSO\cdot \rightarrow \text{Products}$             | $9.96 \times 10^{-14}$ | 4                             |
| 95  | $GS^- + H_2O_2 \rightarrow GSOH + OH^-$                       | $1.60 \times 10^{-21}$ | 75                            |
| 96  | $GS\cdot + AscH \rightarrow GSH + Asc\cdot$                   | $1.00 \times 10^{-12}$ | 76,77                         |
| 97  | $UA + NO_2^{\cdot} \rightarrow UA\cdot + NO_2^-$              | $3.00 \times 10^{-14}$ | 78,79                         |
| 98  | $AscH + NO_2^{\cdot} \rightarrow Asc\cdot + NO_2^-$           | $5.80 \times 10^{-14}$ | 78,79                         |
| 99  | $UA\cdot + AscH \rightarrow UA + Asc\cdot$                    | $1.70 \times 10^{-15}$ | 77                            |
| 100 | $GS\cdot + UA \rightarrow GSH + UA\cdot$                      | $5.00 \times 10^{-14}$ | 74                            |
| 101 | $O_2^{\cdot-} + NO_2^{\cdot} \rightarrow O_2NOO\cdot$         | $7.50 \times 10^{-12}$ | 4,80                          |
| 102 | $O_2NOO\cdot \rightarrow NO_2^- + O_2$                        | $7.00 \times 10^{-1}$  | 4                             |
| 103 | $O_2NOO\cdot \rightarrow O_2^{\cdot-} + NO_2^{\cdot}$         | $1.10 \times 10^0$     | 4                             |
| 104 | $NO_2^{\cdot} + NO_2^{\cdot} \rightarrow N_2O_4$              | $7.50 \times 10^{-13}$ | 81                            |

|     |                                                                                                            |                        |              |
|-----|------------------------------------------------------------------------------------------------------------|------------------------|--------------|
| 105 | $\text{N}_2\text{O}_4 \rightarrow \text{NO}_2^\bullet + \text{NO}_2^\bullet$                               | $6.90 \times 10^3$     | 81           |
| 106 | $\text{N}_2\text{O}_4 + \text{H}_2\text{O} \rightarrow \text{NO}_2^- + \text{NO}_3^- + 2\text{H}^+$        | $1.00 \times 10^3$     | 4            |
| 107 | $\text{O}_2^- + \text{O}_3 + \text{H}_2\text{O} \rightarrow \bullet\text{OH} + 2\text{O}_2 + \text{OH}^-$  | $2.50 \times 10^{-12}$ | 82           |
| 108 | $\text{HO}_2 + \text{O}_3 \rightarrow \bullet\text{OH} + 2\text{O}_2$                                      | $1.66 \times 10^{-17}$ | 82           |
| 109 | $\text{NO}_2^- + \bullet\text{OH} \rightarrow \text{NO}_2^\bullet + \text{OH}^-$                           | $8.80 \times 10^{-12}$ | 80           |
| 110 | $\bullet\text{OH} + \text{NO}_2^\bullet \rightarrow \text{NO}_3^- + \text{H}^+$                            | $7.50 \times 10^{-12}$ | 4            |
| 111 | $\bullet\text{OH} + \text{NO}_2^\bullet \rightarrow \text{ONOOH}$                                          | $7.50 \times 10^{-12}$ | 4            |
| 112 | $\text{ONOOH} \rightarrow \text{NO}_2^\bullet + \bullet\text{OH}$                                          | $3.00 \times 10^{-1}$  | 4            |
| 113 | $\text{ONOOH} \rightarrow \text{NO}_3^- + \text{H}^+$                                                      | $7.00 \times 10^{-1}$  | 4            |
| 114 | $\text{ONOO}^- + \text{GSH} \rightarrow \text{NO}_2^- + \text{GSOH}$                                       | $1.10 \times 10^{-18}$ | 83           |
| 115 | $\text{GSO}^\bullet + \text{NO}_2^\bullet \rightarrow \text{GSOONO}$                                       | $7.50 \times 10^{-12}$ | 4            |
| 116 | $\text{GSOONO} + \text{H}_2\text{O} \rightarrow \text{Products}$                                           | $7.00 \times 10^2$     | 4            |
| 117 | $\text{ONOOH} + \text{AscH} \rightarrow \text{Im}_1$                                                       | $1.66 \times 10^{-15}$ | 84           |
| 118 | $\text{Im}_1 \rightarrow \text{ONOOH} + \text{AscH}$                                                       | $5.00 \times 10^2$     | 84           |
| 119 | $\text{Im}_1 \rightarrow \text{Im}_2$                                                                      | $4.00 \times 10^1$     | 84           |
| 120 | $\text{Im}_2 \rightarrow \text{Im}_1$                                                                      | $5.00 \times 10^0$     | 84           |
| 121 | $\text{Im}_2 + \text{AscH} \rightarrow \text{Asc} + \text{DHA} + \text{NO}_2^- + \text{H}_2\text{O}$       | $1.66 \times 10^{-19}$ | 84           |
| 122 | $\text{Im}_2 \rightarrow \text{Asc} + \text{NO}_3^- + \text{H}^+$                                          | $8.50 \times 10^{-1}$  | 84           |
| 123 | $\text{ONOOH} + \text{UA} \rightarrow \text{UA}^{\text{rad}} + \text{NO}_2 + \text{Products}$              | $2.60 \times 10^{-19}$ | 85           |
| 124 | $\text{O}_2^\bullet + \text{SOD} + \text{H}^+ \rightarrow 0.5 \text{H}_2\text{O}_2 + \text{SOD}$           | $2.65 \times 10^{-12}$ | See text S2. |
| 125 | $\text{H}_2\text{O}_2 + \text{catalase} \rightarrow \text{H}_2\text{O} + 0.5 \text{O}_2 + \text{catalase}$ | $3.20 \times 10^{-14}$ | See text S2. |
| 126 | $\bullet\text{OH} + \text{organic matter} \rightarrow \text{oxidized organic matter}$                      | $1.66 \times 10^{-12}$ | 21,65        |

660 **Table S2.** Input parameters to the KM-SUB-ELF model

| <b>Parameter</b>  | <b>Description</b>                                       | <b>Value</b>                        |
|-------------------|----------------------------------------------------------|-------------------------------------|
| $KH_{ccO_3}$      | Henry's law equilibrium constant for $O_3$ [aq]/[gas]    | $1.7 \times 10^{-1}$                |
| $KH_{ccNO_2}$     | Henry's law equilibrium constant for $NO_2$ [aq]/[gas]   | $2.2 \times 10^{-1}$                |
| $KH_{ccNO}$       | Henry's law equilibrium constant for $NO$ [aq]/[gas]     | $3.9 \times 10^{-2}$                |
| $KH_{ccOH}$       | Henry's law equilibrium constant for $OH$ [aq]/[gas]     | $4.3 \times 10^2$                   |
| $KH_{ccHO_2}$     | Henry's law equilibrium constant for $HO_2$ [aq]/[gas]   | $1.7 \times 10^3$                   |
| $KH_{ccH_2O_2}$   | Henry's law equilibrium constant for $H_2O_2$ [aq]/[gas] | $9.9 \times 10^4$                   |
| $\omega_{O_3}$    | Mean thermal velocity of $O_3$                           | $3.7 \times 10^4 \text{ cm s}^{-1}$ |
| $\omega_{NO_2}$   | Mean thermal velocity of $NO_2$                          | $3.8 \times 10^4 \text{ cm s}^{-1}$ |
| $\omega_{NO}$     | Mean thermal velocity of $NO$                            | $4.7 \times 10^4 \text{ cm s}^{-1}$ |
| $\omega_{OH}$     | Mean thermal velocity of $OH$                            | $6.2 \times 10^4 \text{ cm s}^{-1}$ |
| $\omega_{HO_2}$   | Mean thermal velocity of $HO_2$                          | $4.5 \times 10^4 \text{ cm s}^{-1}$ |
| $\omega_{H_2O_2}$ | Mean thermal velocity of $H_2O_2$                        | $4.4 \times 10^4 \text{ cm s}^{-1}$ |
| $MW_{aa}$         | Average molecular weight of amino acids                  | $125 \text{ g mole}^{-1}$           |
| $MW_{Cu}$         | Molecular weight copper                                  | $63.6 \text{ g mole}^{-1}$          |
| $MW_{Fe}$         | Molecular weight iron                                    | $55.6 \text{ g mole}^{-1}$          |
| $MW_{SOA}$        | Average molecular weight SOA                             | $250 \text{ g mole}^{-1}$           |
| $MW_{PQN}$        | Molecular weight phenanthrenequinone (PQN)               | $208.2 \text{ g mole}^{-1}$         |
| $MW_{NQN}$        | Molecular weight naphthoquinone (NQN)                    | $158.2 \text{ g mole}^{-1}$         |
| $pK_{aGSH}$       | Acid dissociation constant of GSH                        | 8.8                                 |
| $pK_{aHO_2}$      | Acid dissociation constant of $HO_2$                     | 4.8                                 |
| $pK_{aONOOH}$     | Acid dissociation constant of ONOOH                      | 6.5                                 |
| $VR$              | Lung ventilation rate                                    | $1.5 \text{ m}^3 \text{ h}^{-1}$    |
| $BR$              | Breathing rate                                           | $16 \text{ min}^{-1}$               |
| $FCR$             | Functional residual capacity of the lung                 | $2750 \text{ cm}^3$                 |
| $TV$              | Tidal Volume – Breath volume                             | $1500 \text{ cm}^3$                 |
| $SA_{ELF}$        | Total ELF surface area                                   | $890000 \text{ cm}^2$               |
| $T_{RT}$          | Respiratory tract temperature                            | $37^\circ\text{C}$                  |
| $pH_{ELF}$        | pH of the ELF                                            | 7                                   |

662 **Table S3.** List of symbols and definitions

| Symbol                  | Meaning                                                          | SI unit                            |
|-------------------------|------------------------------------------------------------------|------------------------------------|
| $C_Y$                   | ELF concentration of PM2.5 constituent Y                         | $\mu\text{mol L}^{-1}$             |
| $C_{\text{gas,PM2.5}}$  | Ambient gas phase concentration of PM2.5                         | $\mu\text{g m}^{-3}$               |
| $C_{\Sigma\text{ROS}}$  | ROS concentration in the ELF during or after model simulation    | $\text{nmol L}^{-1}$               |
| $d_{\text{PM2.5}}$      | Fraction of PM2.5 that deposits in the ELF                       |                                    |
| $D_{\text{PM2.5}}$      | Dose of PM2.5 deposited in the ELF                               | $\mu\text{g}$                      |
| $I_{i \rightarrow j}$   | Gross chemical interconversion between individual ROS in the ELF | $\text{nmol L}^{-1}$               |
| $I_{\Sigma\text{ROS}}$  | Gross chemical interconversion between all ROS in the ELF        | $\text{nmol L}^{-1}$               |
| $MF_Y$                  | PM2.5 mass fraction of constituent Y                             |                                    |
| $M_Y$                   | Molar mass of PM2.5 constituent Y                                | $\text{g mol}^{-1}$                |
| $N_{\Sigma\text{ROS}}$  | Cumulative production of ROS in the ELF                          | $\text{nmol L}^{-1}$               |
| $N'_{\Sigma\text{ROS}}$ | Cumulative production rate of ROS in the ELF                     | $\text{nmol L}^{-1} \text{s}^{-1}$ |
| $P_{\Sigma\text{ROS}}$  | Gross chemical production of ROS in the ELF                      | $\text{nmol L}^{-1}$               |
| $P'_{\Sigma\text{ROS}}$ | Gross chemical production rate of ROS in the ELF                 | $\text{nmol L}^{-1} \text{s}^{-1}$ |
| $P$                     | Gross chemical production of an individual ROS in the ELF        | $\text{nmol L}^{-1}$               |
| $SF_Y$                  | Soluble fraction of PM2.5 constituent Y in ELF                   |                                    |
| $t_{\text{acc}}$        | Accumulation time of PM2.5 in the ELF                            | h                                  |
| $t_{\text{sim}}$        | Model simulation time                                            | h                                  |
| $V_{\text{ELF}}$        | Volume of the ELF                                                | mL                                 |
| $VR$                    | Lung ventilation rate                                            | $\text{m}^3 \text{h}^{-1}$         |
| $Y_{\text{OH}}$         | OH yield in the ELF                                              | $\mu\text{mol}$                    |

663

**Table S4.** Mathematical formulas used to calculate ELF ROS metrics

$$I_{\Sigma\text{ROS}} = \sum_{j,i>j} I_{i \rightarrow j}$$

$$N_{\Sigma\text{ROS}} = P_{\Sigma\text{ROS}} - I_{\Sigma\text{ROS}}$$

$$N'_{\Sigma\text{ROS}} = (P_{\Sigma\text{ROS}} - I_{\Sigma\text{ROS}}) / t_{\text{sim}}$$

$$P'_{\Sigma\text{ROS}} = P_{\Sigma\text{ROS}} / t_{\text{sim}}$$

664



**Table S5.** PM2.5 and transition metal concentrations with mass fractions as quantified in PM2.5 collected at different sampling sites throughout the world.

| <b>Sampling location</b>               | <b>PM2.5<br/>(<math>\mu\text{g m}^{-3}</math>)</b> | <b>Fe<br/>(<math>\text{ng m}^{-3}</math>)</b> | <b>Cu<br/>(<math>\text{ng m}^{-3}</math>)</b> | <b>Fe<br/>mass fraction</b> | <b>Cu<br/>mass fraction</b> | <b>Reference</b> |
|----------------------------------------|----------------------------------------------------|-----------------------------------------------|-----------------------------------------------|-----------------------------|-----------------------------|------------------|
| Amazon (wet season)                    | 1.65                                               | 33                                            | 0.07                                          | $2.00 \times 10^{-2}$       | $4.24 \times 10^{-5}$       | 86               |
| Mace Head (Ireland)                    | 4.2                                                | 5.68                                          | 0.71                                          | $1.35 \times 10^{-3}$       | $1.69 \times 10^{-4}$       | 87               |
| Amazon (dry season)                    | 4.87                                               | 19                                            | 0.8                                           | $3.90 \times 10^{-3}$       | $1.64 \times 10^{-4}$       | 86               |
| Edinburgh (Scotland)                   | 7.1                                                | 27.6                                          | 1.39                                          | $3.89 \times 10^{-3}$       | $1.96 \times 10^{-4}$       | 88               |
| West Midlands (UK, rural)              | 7.6                                                | 51.3                                          | 13.5                                          | $6.75 \times 10^{-3}$       | $1.78 \times 10^{-4}$       | 89               |
| West Midlands (UK, urban)              | 9                                                  | 80.2                                          | 13.9                                          | $8.91 \times 10^{-3}$       | $1.54 \times 10^{-3}$       | 89               |
| Skukuza (South Africa)                 | 9.4                                                | 51                                            | 0.41                                          | $5.43 \times 10^{-3}$       | $4.36 \times 10^{-5}$       | 90               |
| Amazon (Serro do Navio)                | 9.87                                               | 120                                           | 1.65                                          | $1.22 \times 10^{-2}$       | $1.67 \times 10^{-4}$       | 91               |
| Amazon (Cuiabá)                        | 10.5                                               | 175                                           | 1.55                                          | $1.67 \times 10^{-2}$       | $1.48 \times 10^{-4}$       | 91               |
| West Midlands (UK, rural, average)     | 10.5                                               | 87.1                                          | 20                                            | $8.30 \times 10^{-3}$       | $1.91 \times 10^{-3}$       | 89               |
| West Midlands (UK, urban, average)     | 11.6                                               | 102                                           | 21.9                                          | $8.79 \times 10^{-3}$       | $1.89 \times 10^{-3}$       | 89               |
| Helsinki (Finland)                     | 11.8                                               | 96                                            | 3.1                                           | $8.14 \times 10^{-3}$       | $2.63 \times 10^{-4}$       | 92               |
| Tampa (Florida)                        | 12.7                                               | 79                                            | 2.4                                           | $6.22 \times 10^{-3}$       | $1.89 \times 10^{-4}$       | 93               |
| Toronto (Canada)                       | 12.7                                               | 55                                            | 2.5                                           | $4.33 \times 10^{-3}$       | $1.97 \times 10^{-4}$       | 94               |
| South Phoenix (Texas)                  | 12.95                                              | 147                                           | 7.6                                           | $1.14 \times 10^{-2}$       | $5.87 \times 10^{-4}$       | 95               |
| Tehran (inside a school dormitory)     | 14                                                 | 102.13                                        | 22.17                                         | $7.30 \times 10^{-3}$       | $1.58 \times 10^{-3}$       | 96               |
| Tehran (inside a retirement home)      | 15                                                 | 130.78                                        | 25.1                                          | $8.72 \times 10^{-3}$       | $1.67 \times 10^{-3}$       | 96               |
| South-Eastern Italy (background sites) | 16.4                                               | 86.8                                          | 3.1                                           | $5.29 \times 10^{-3}$       | $1.89 \times 10^{-4}$       | 97               |
| Patras (Greece)                        | 17.4                                               | 124                                           | 7.28                                          | $7.13 \times 10^{-3}$       | $4.18 \times 10^{-4}$       | 98               |
| Yeongwol (South Korea)                 | 19.7                                               | 31.2                                          | 9.8                                           | $1.58 \times 10^{-3}$       | $4.98 \times 10^{-4}$       | 99               |
| Budapest (Hungary)                     | 20                                                 | 430                                           | 18.3                                          | $2.15 \times 10^{-2}$       | $9.15 \times 10^{-4}$       | 100              |
| South-Eastern Italy (industrial sites) | 21.7                                               | 85                                            | 5.1                                           | $3.92 \times 10^{-3}$       | $2.35 \times 10^{-4}$       | 97               |

|                                          |       |        |       |                       |                       |     |
|------------------------------------------|-------|--------|-------|-----------------------|-----------------------|-----|
| Zabrze (upper Silesia, Poland)           | 22    | 160.8  | 6.5   | $7.31 \times 10^{-3}$ | $2.96 \times 10^{-4}$ | 101 |
| Chuncheon (South Korea)                  | 23    | 29.6   | 9.9   | $1.29 \times 10^{-3}$ | $4.30 \times 10^{-4}$ | 99  |
| Detroit (Michigan)                       | 23    | 234    | 6     | $1.02 \times 10^{-2}$ | $2.61 \times 10^{-4}$ | 102 |
| Megalopolis (Greece)                     | 23    | 87     | 4.02  | $3.78 \times 10^{-3}$ | $1.75 \times 10^{-4}$ | 98  |
| Tehran (outside a retirement home)       | 24    | 238.81 | 25.99 | $9.95 \times 10^{-3}$ | $1.08 \times 10^{-3}$ | 96  |
| South-Eastern Italy (urban sites)        | 24.1  | 78.8   | 5.7   | $3.27 \times 10^{-3}$ | $2.37 \times 10^{-4}$ | 97  |
| Tehran (outside a school dormitory)      | 26    | 280    | 32.42 | $1.08 \times 10^{-2}$ | $1.25 \times 10^{-3}$ | 96  |
| Anaheim (California)                     | 26.8  | 29.6   | 39.6  | $1.11 \times 10^{-3}$ | $1.48 \times 10^{-3}$ | 103 |
| Milan (Summer, Italy)                    | 27.2  | 186    | 10    | $6.84 \times 10^{-3}$ | $3.68 \times 10^{-4}$ | 104 |
| Jeddah City (Saudi Arabia)               | 28.4  | 590    | 5.6   | $2.08 \times 10^{-2}$ | $1.97 \times 10^{-4}$ | 105 |
| Hong Kong                                | 29    | 140    | 5.7   | $4.83 \times 10^{-3}$ | $1.97 \times 10^{-4}$ | 106 |
| Rio de Janeiro (Brazil)                  | 29.2  | 307    | 35    | $1.05 \times 10^{-2}$ | $1.20 \times 10^{-3}$ | 107 |
| Katowice (upper Silesia, Poland)         | 31    | 157    | 8.2   | $5.07 \times 10^{-3}$ | $2.65 \times 10^{-4}$ | 101 |
| Porto Marghera (Italy)                   | 31    | 200    | 9.3   | $6.45 \times 10^{-3}$ | $3.00 \times 10^{-4}$ | 108 |
| Erzgebirge (Germany)                     | 32.5  | 188    | 3     | $5.79 \times 10^{-3}$ | $9.23 \times 10^{-5}$ | 109 |
| Barcelona (Spain)                        | 35    | 260    | 52    | $7.43 \times 10^{-3}$ | $1.49 \times 10^{-3}$ | 110 |
| Santa Catarina (Mexico)                  | 36.15 | 466    | 16    | $1.29 \times 10^{-2}$ | $4.42 \times 10^{-4}$ | 111 |
| Escobedo (Mexico)                        | 37.78 | 493    | 13    | $1.31 \times 10^{-2}$ | $3.44 \times 10^{-4}$ | 111 |
| Arnhem (the Netherlands)                 | 38.95 | 241    | 13.5  | $6.19 \times 10^{-3}$ | $3.47 \times 10^{-4}$ | 112 |
| Mira Loma (Southern California, average) | 41.8  | 581    | 75    | $1.39 \times 10^{-2}$ | $1.79 \times 10^{-3}$ | 113 |
| Taif (residential area, Saudi Arabia)    | 46    | 2000   | 5.3   | $4.35 \times 10^{-2}$ | $1.15 \times 10^{-4}$ | 114 |
| Taif (industrial site, Saudi Arabia)     | 47    | 2300   | 13    | $4.89 \times 10^{-2}$ | $2.77 \times 10^{-4}$ | 114 |
| Azusa (California)                       | 47.1  | 281.9  | 13.4  | $5.99 \times 10^{-3}$ | $2.85 \times 10^{-4}$ | 103 |
| Edison (New Jersey)                      | 49.6  | 1953   | 10    | $3.94 \times 10^{-2}$ | $2.02 \times 10^{-4}$ | 115 |
| Bursa (Turkey)                           | 53    | 875    | 15    | $1.65 \times 10^{-2}$ | $2.83 \times 10^{-4}$ | 116 |
| Karachi (summer, Pakistan)               | 55.89 | 3360   | 56    | $6.01 \times 10^{-2}$ | $1.00 \times 10^{-3}$ | 117 |
| New Delhi (summer, high traffic, India)  | 58.2  | 710    | 20    | $1.22 \times 10^{-2}$ | $3.44 \times 10^{-4}$ | 118 |

|                                         |        |        |      |                       |                       |                   |
|-----------------------------------------|--------|--------|------|-----------------------|-----------------------|-------------------|
| Milan (Winter, Italy)                   | 58.6   | 309    | 18   | $5.27 \times 10^{-3}$ | $3.07 \times 10^{-4}$ | 104               |
| Thessaloniki (cold period, Greece)      | 60.9   | 2890   | 93   | $4.75 \times 10^{-2}$ | $1.53 \times 10^{-3}$ | 119               |
| Thessaloniki (warm period, Greece)      | 70.6   | 4094   | 66   | $5.60 \times 10^{-2}$ | $9.35 \times 10^{-4}$ | 119               |
| Córdoba City (Argentina)                | 70.87  | 325    | 8    | $4.59 \times 10^{-3}$ | $1.13 \times 10^{-4}$ | 120               |
| Shanghai (China)                        | 71.61  | 424.93 | 9.47 | $5.93 \times 10^{-3}$ | $1.32 \times 10^{-4}$ | 121               |
| Yong'an (Winter, China)                 | 79.01  | 582.1  | 19.6 | $7.37 \times 10^{-3}$ | $2.48 \times 10^{-4}$ | 122               |
| Yong'an (Spring, China)                 | 83.26  | 736.1  | 16.5 | $8.84 \times 10^{-3}$ | $1.98 \times 10^{-4}$ | 122               |
| Karachi (winter, Pakistan)              | 98.44  | 3706   | 39   | $3.77 \times 10^{-2}$ | $3.96 \times 10^{-4}$ | 117               |
| Ji'nan (urban site, China)              | 101    | 1040   | 30   | $1.03 \times 10^{-2}$ | $2.97 \times 10^{-4}$ | 123               |
| Guangzhou (China)                       | 104.58 | 66     | 60   | $6.31 \times 10^{-4}$ | $5.74 \times 10^{-4}$ | 124               |
| Argra (urban, India)                    | 104.9  | 1900   | 200  | $1.81 \times 10^{-2}$ | $1.91 \times 10^{-3}$ | 125               |
| Pune (India)                            | 113.8  | 2090   | 339  | $1.84 \times 10^{-2}$ | $2.98 \times 10^{-3}$ | 126               |
| Beijing (Summer, China)                 | 125    | 1060   | 44.7 | $8.48 \times 10^{-3}$ | $3.58 \times 10^{-4}$ | 127               |
| Ji'nan (industrial site, China)         | 130    | 2410   | 40   | $1.85 \times 10^{-2}$ | $3.08 \times 10^{-4}$ | 123               |
| Beijing (Winter, China)                 | 138    | 1330   | 53.2 | $9.64 \times 10^{-3}$ | $3.86 \times 10^{-4}$ | 127               |
| Beijing (China)                         | 182.2  | 1180   | 70   | $6.48 \times 10^{-3}$ | $3.84 \times 10^{-4}$ | 128               |
| New Delhi (winter, high traffic, India) | 276.9  | 1150   | 70   | $4.15 \times 10^{-3}$ | $2.53 \times 10^{-4}$ | 118               |
| Peat fire episode (Indonesia)           | 640    | 4810   | 100  | $7.52 \times 10^{-3}$ | $1.56 \times 10^{-4}$ | 129               |
| <i>Iron and copper medians</i>          | –      | –      | –    | $8.14 \times 10^{-3}$ | $3.07 \times 10^{-4}$ | <i>This study</i> |

**Table S6.** PM2.5 and SOA concentrations with mass fractions as quantified in PM2.5 collected at different sampling sites throughout the world.

| <b>Sampling location</b> | <b>PM2.5<br/>(<math>\mu\text{g m}^{-3}</math>)</b> | <b>SOA<br/>(<math>\mu\text{g m}^{-3}</math>)</b> | <b>SOA<br/>mass fraction</b> | <b>Reference</b> |
|--------------------------|----------------------------------------------------|--------------------------------------------------|------------------------------|------------------|
| Amazon (Brazil)          | 1.8                                                | 0.34                                             | 0.189                        | 130              |
| Hyytiälä (Finland)       | 2                                                  | 1.2                                              | 0.60                         | 131              |
| Storm Peak (Colorado)    | 2.1                                                | 0.7                                              | 0.333                        | 131              |

|                                  |      |     |       |     |
|----------------------------------|------|-----|-------|-----|
| Jungfrauoch (Switzerland)        | 2.2  | 1.2 | 0.545 | 131 |
| Duke Forest (North Carolina)     | 2.8  | 1.3 | 0.464 | 131 |
| Chebogue Pt. (Canada)            | 2.9  | 1.5 | 0.517 | 131 |
| Edinburgh (Scotland)             | 3    | 1.2 | 0.400 | 131 |
| Mainz (Germany)                  | 4.3  | 1.1 | 0.256 | 131 |
| Boulder (Colorado)               | 4.4  | 2.5 | 0.568 | 131 |
| Manchester (winter, UK)          | 5.2  | 0.6 | 0.115 | 131 |
| Chelmsford (UK)                  | 5.3  | 1.8 | 0.340 | 131 |
| Vancouver (Canada)               | 7    | 2.5 | 0.357 | 131 |
| Okinawa (Japan)                  | 7.9  | 1.7 | 0.215 | 131 |
| Off New England Coast            | 8.5  | 4.9 | 0.576 | 131 |
| Thompson Farm (New Hampshire)    | 9.5  | 4.2 | 0.442 | 131 |
| Zurich (winter, Switzerland)     | 9.6  | 4.3 | 0.448 | 131 |
| Cheju (South Korea)              | 10.7 | 4   | 0.374 | 131 |
| Fukue (Japan)                    | 11   | 3.6 | 0.327 | 131 |
| New York City (winter, New York) | 11.6 | 2.6 | 0.224 | 131 |
| New York City (summer, New York) | 12.2 | 4.8 | 0.393 | 131 |
| Pinnacle Park (New York)         | 12.3 | 5.4 | 0.439 | 131 |
| Houston (Texas)                  | 12.8 | 2.7 | 0.211 | 131 |
| Tokyo (summer, Japan)            | 13.2 | 4.7 | 0.356 | 131 |
| Manchester (summer, UK)          | 14.3 | 3   | 0.210 | 131 |
| Pittsburgh (Pensylvenia)         | 14.7 | 3.1 | 0.211 | 131 |
| Tokyo (winter, Japan)            | 16.2 | 2.3 | 0.142 | 131 |
| Taunus (Germany)                 | 16.3 | 7.9 | 0.485 | 131 |
| Riverside (California)           | 19.1 | 7   | 0.366 | 131 |
| Zurich (summer, Switzerland)     | 25.5 | 5.1 | 0.200 | 131 |
| Mexico City (Mexico)             | 26.8 | 8.1 | 0.302 | 131 |

|                   |       |      |       |                   |
|-------------------|-------|------|-------|-------------------|
| Guangzhou (China) | 69.1  | 12.5 | 0.181 | 132               |
| Beijing (China)   | 79.9  | 16.6 | 0.208 | 132               |
| Shanghai (China)  | 90.7  | 11.1 | 0.122 | 132               |
| Beijing (China)   | 158.5 | 40.9 | 0.258 | 132               |
| Xi'an (China)     | 345.1 | 53.5 | 0.155 | 132               |
| SOA median        | –     | –    | 0.333 | <i>This study</i> |

**Table S7.** PM2.5, Phenanthrenequinone (PQN), 1,4-naphthoquinone (1,4-NQN) and 1,2-naphthoquinone (1,2-NQN) concentrations with mass fractions as quantified in PM2.5 collected at different sampling sites throughout the world. \*see SI section on particulate pollutant concentrations in the ELF.

| Sampling location            | PM2.5<br>( $\mu\text{g m}^{-3}$ ) | PQN<br>( $\text{ng m}^{-3}$ ) | 1,2-NQN<br>( $\text{ng m}^{-3}$ ) | 1,4-NQN<br>( $\text{ng m}^{-3}$ ) | PQN<br>mass fraction  | 1,2-NQN<br>mass fraction | 1,4-NQN<br>mass fraction | Reference         |
|------------------------------|-----------------------------------|-------------------------------|-----------------------------------|-----------------------------------|-----------------------|--------------------------|--------------------------|-------------------|
| Umea (Sweden)                | 7.8                               | Unknown                       | Unknown                           | 0.03                              | $2.6 \times 10^{-6}$  | $1.3 \times 10^{-6}$     | $1.3 \times 10^{-6}$     | 133               |
| Athens (Greece)              | 35.6                              | 0.071                         | 0.157                             | 0.26                              | $2.69 \times 10^{-6}$ | $5.95 \times 10^{-6}$    | $9.86 \times 10^{-6}$    | 134               |
| Mazar-e Sharif (Afghanistan) | 69                                | Unknown                       | Unknown                           | 0.027                             | $1.06 \times 10^{-6}$ | $5.28 \times 10^{-7}$    | $5.28 \times 10^{-7}$    | 133               |
| Kabul (Afghanistan)          | 86                                | Unknown                       | Unknown                           | 0.2                               | $6.28 \times 10^{-6}$ | $3.14 \times 10^{-6}$    | $3.14 \times 10^{-6}$    | 133               |
|                              |                                   |                               |                                   |                                   |                       |                          |                          | 120               |
| Atascadero (California)      | 5*                                | 0.023                         | 0.0127                            | 0.0246                            | $6.21 \times 10^{-6}$ | $3.43 \times 10^{-6}$    | $6.64 \times 10^{-6}$    |                   |
| Birmingham (UK)              | 15*                               | 4.6                           | 3.2                               | 1.7                               | $4.14 \times 10^{-4}$ | $2.88 \times 10^{-4}$    | $1.53 \times 10^{-4}$    | 136               |
| Lake Elsinore (California)   | 20*                               | 0.311                         | 0.246                             | 0.14                              | $2.1 \times 10^{-5}$  | $1.66 \times 10^{-5}$    | $9.45 \times 10^{-6}$    | 135               |
| Norfolk (UK)                 | 5*                                | 0.058                         | 0.024                             | 0.012                             | $1.57 \times 10^{-5}$ | $6.48 \times 10^{-6}$    | $3.24 \times 10^{-6}$    | 137               |
| Riverside (California)       | 25*                               | 0.57                          | 0.06                              | 0.23                              | $3.08 \times 10^{-5}$ | $3.24 \times 10^{-6}$    | $1.24 \times 10^{-5}$    | 138               |
| Quinones median              | –                                 | –                             | –                                 | –                                 | $6.28 \times 10^{-6}$ | $3.43 \times 10^{-6}$    | $6.64 \times 10^{-6}$    | <i>This study</i> |

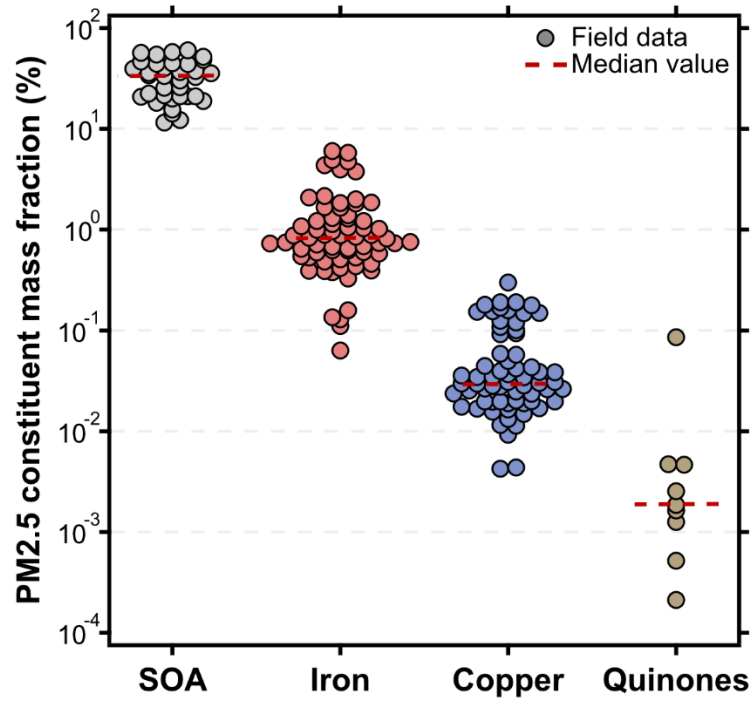

**Figure S1.** Mass fractions of all redox-active PM2.5 constituents quantified in field data (Tabs. S5-7). The median mass fraction of each redox-active PM2.5 constituent is indicated by the red horizontal line.

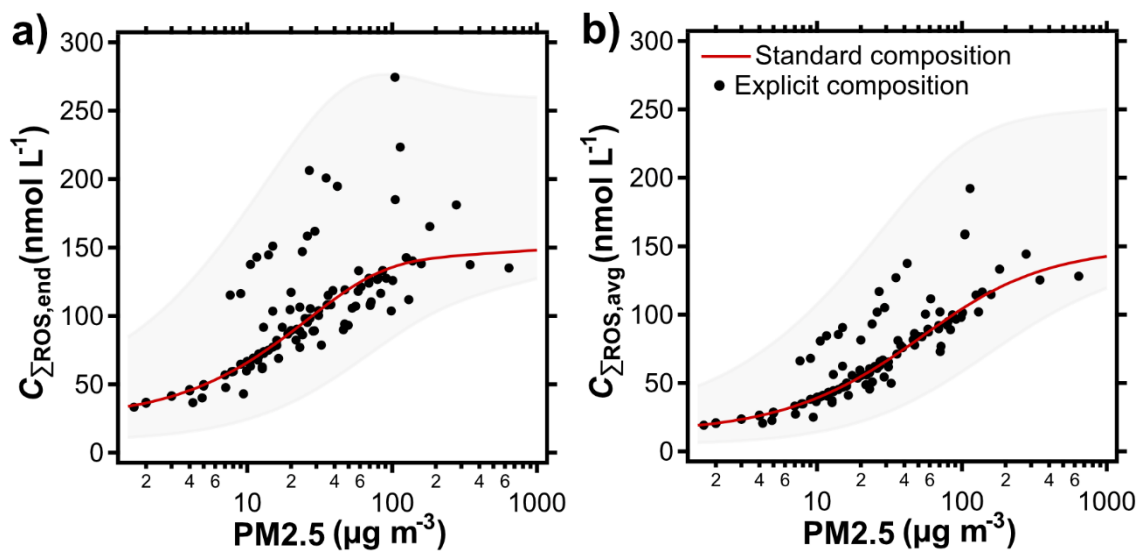

**Figure S2.** (a) ROS concentration,  $C_{\Sigma ROS, end}$ , after pollutant exposure, and (b) the average ROS concentration,  $C_{\Sigma ROS, avg}$ , during pollutant exposure as a function of PM2.5 concentration. The solid lines represent a standard composition of PM2.5 using median mass fractions of the redox-active constituents. Black markers represent calculations using explicit PM2.5 composition field data (Tab. S5-7)

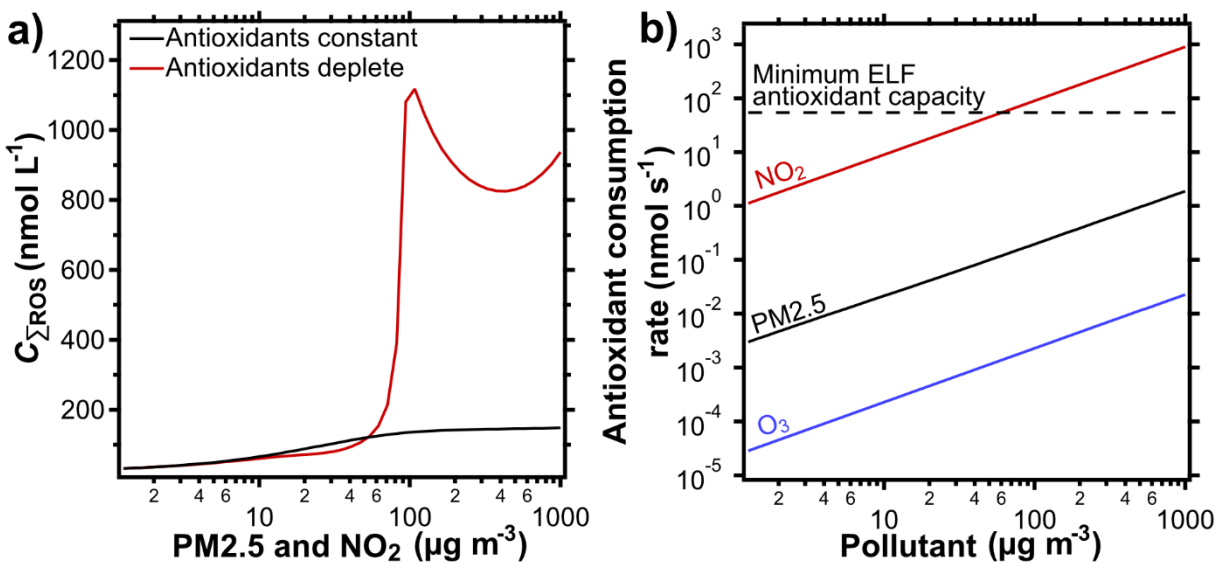

**Figure S3.** (a) ROS concentrations,  $C_{\Sigma ROS}$ , as a function of pollutant concentration with and without consideration of antioxidant depletion in the model. One  $\mu\text{g}$  of the co-pollutant NO<sub>2</sub> is added per  $\mu\text{g}$  PM2.5. For O<sub>3</sub>, a constant concentration of 30  $\mu\text{g m}^{-3}$  was used, independent of PM2.5 concentration. (b) Antioxidant consumption rate of NO<sub>2</sub>, PM2.5 and O<sub>3</sub> as a function of pollutant concentration. The dashed line indicates the antioxidant consumption rate at which the ELF antioxidants would deplete in healthy humans within two hours of pollutant exposure without the consideration of enzymes or antioxidant replenishment.



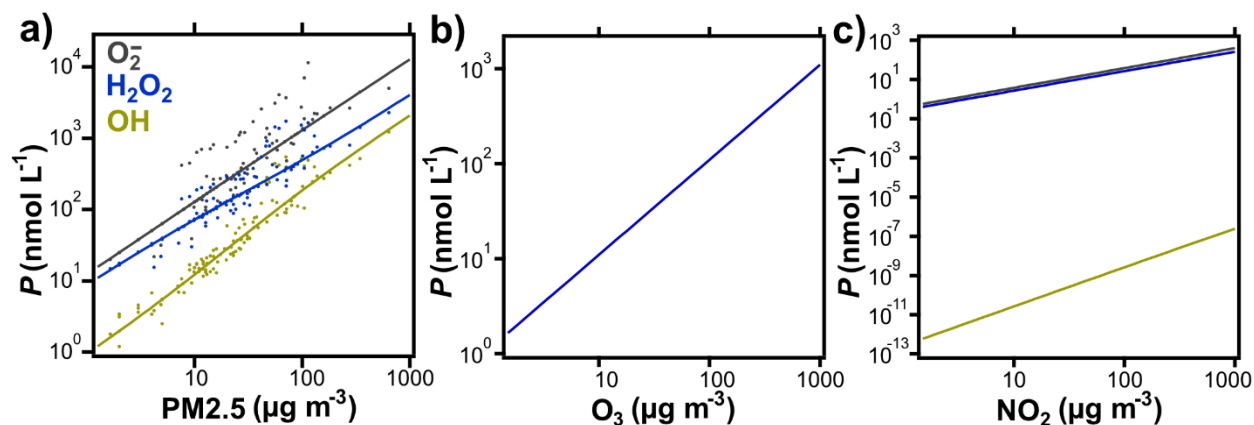

**Figure S4.** Gross chemical production of individual ROS in the ELF solely associated with and as a function of the concentration of three pollutants: (a) PM<sub>2.5</sub>, (b) O<sub>3</sub>, and (c) NO<sub>2</sub>. Simulations were carried out using only the single pollutant. In panel a, the solid lines represent standard PM<sub>2.5</sub> composition, and the markers represent explicit PM<sub>2.5</sub> composition data for redox-active constituents (Tabs. S5-7). O<sub>3</sub> does not contribute to production of O<sub>2</sub><sup>-</sup> or OH in the model.

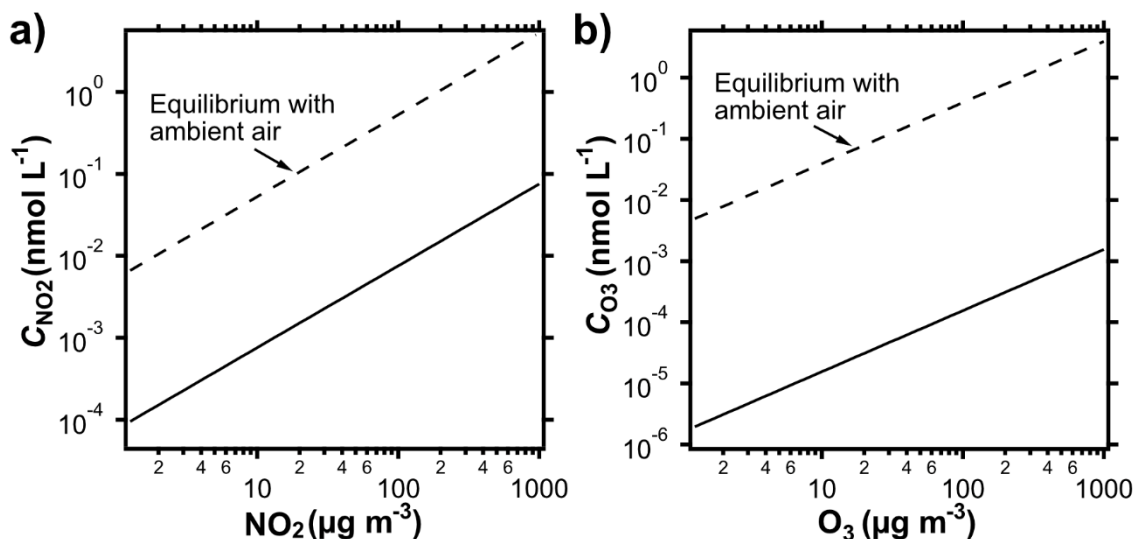

**Figure S5.** Aqueous-phase (a) NO<sub>2</sub> concentration and (b) O<sub>3</sub> concentration in the ELF as a function of pollutant concentration and comparison to hypothetical saturation with respect to ambient air. Dashed lines indicate saturation concentrations assuming Henry's law equilibrium, which are calculated using the ambient gas phase pollutant concentration and the dimensionless water–air partitioning coefficients for O<sub>3</sub> and NO<sub>2</sub>, respectively (Table S2).

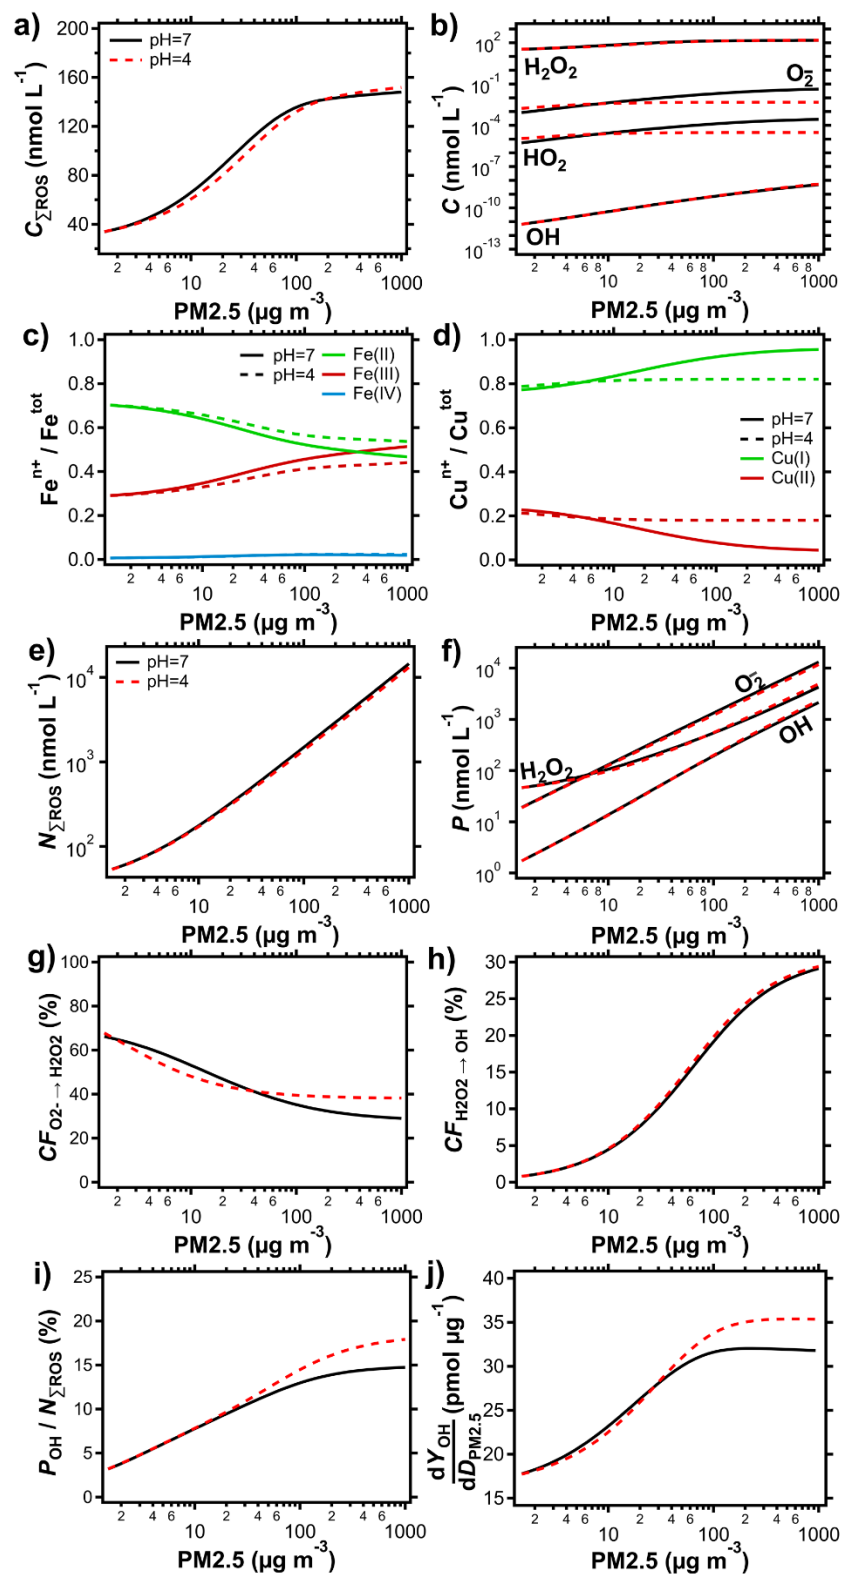

**Figure S6.** Effect of using different pH on the main results (panels a,b, e-j) and transition metal valence state (panels c,d) using the median mass fractions of all redox-active PM2.5 constituents, co-varied NO<sub>2</sub> (PM2.5:NO<sub>2</sub> = 1:1) and an O<sub>3</sub> concentration of 30  $\mu\text{g m}^{-3}$ .
